# Supplementary material for: Meltwater runoff and glacier mass balance in the high Arctic: 1991–2022 simulations for Svalbard
Source: Copernicus journal article supplement (doi:10.5194/egusphere-2022-1409), 2023-02-08
Supplement: Supplementary file [file egusphere-2022-1409-RC2-supplement.pdf]

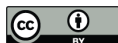

# Meltwater runoff and glacier mass balance in the high Arctic: 1991-2022 simulations for Svalbard

Louise Steffensen Schmidt<sup>1</sup>, Thomas V. Schuler<sup>1</sup>, Erin Emily Thomas<sup>2,3</sup>, and Sebastian Westermann<sup>1</sup>

<sup>1</sup>Department of Geosciences, University of Oslo, Norway

<sup>2</sup>Norwegian Meteorological Institute, Oslo, Norway.

<sup>3</sup>Current Affiliation: Fluid Dynamics and Solid Mechanics, Los Alamos National Laboratory, Los Alamos, NM, USA

**Correspondence:** Louise Steffensen Schmidt (l.s.schmidt@geo.uio.no)

**Abstract.** The Arctic is undergoing increased warming compared to the global mean, which has major implications for freshwater runoff into the oceans from seasonal snow and glaciers. Here, we present high-resolution (2.5 km) simulations of glacier mass balance, runoff and snow conditions in Svalbard from 1991-2022, one of the fastest warming regions in the Arctic. The simulations are created using the CryoGrid community model forced by both CARRA reanalysis (1991-2021) and AROME-ARCTIC forecasts (2016-2022). Updates to the water percolation and runoff scheme are implemented in the CryoGrid model for the simulations. In-situ observations available for Svalbard are used to carefully evaluate the quality of the simulations and model forcing. The overlap period of 2016-2021, when both CARRA and AROME-ARCTIC data are available, is used to evaluate the consistency between the two forcing datasets.

We find a slightly negative climatic mass balance (cmb) over the simulation period of  $-0.08 \text{ m w.e. yr}^{-1}$ , but with no statistically significant trend. The average runoff was found to be  $41 \text{ Gt yr}^{-1}$ , with a significant increasing trend of  $6.3 \text{ Gt decade}^{-1}$ . In addition, we find the simulated climatic mass balance and runoff using CARRA and AROME-ARCTIC forcing are similar, and differ by only  $0.1 \text{ m w.e.}$  in climatic mass balance and by  $0.2 \text{ m w.e.}$  in glacier runoff when averaged over all of Svalbard. There is, however, a clear difference over Nordenskiöldland, where AROME-ARCTIC simulates significantly higher mass balance and significantly lower runoff. This indicates that AROME-ARCTIC may provide high-quality predictions of the total mass balance of Svalbard, but regional uncertainties should be taken into consideration.

The data produced from both the CARRA and AROME-ARCTIC forced CryoGrid simulations are made publicly available, and these high resolution simulation may be re-used in a wide range of applications including studies on glacial runoff, ocean currents, and ecosystems.



## 1 Introduction

20 Glaciers and ice caps are considered to be good indicators of climate change. During the last decades, glaciers and ice caps worldwide have been responding to a globally warming climate by melting at increasing rates (e.g. Vaughan et al., 2013; Huss and Hock, 2018). The Arctic has experienced greater warming than the global average due to positive feedbacks triggered by changing sea ice cover, the so-called Arctic amplification (e.g. Serreze and Francis, 2006; Graversen et al., 2008; Lind et al., 2018). As sea ice continues to retreat, further warming in the Arctic is expected (e.g. IPCC, 2019).

25 In particular, the region around the Barents Sea, which includes the archipelagos of Svalbard, Franz Josef Land and Novaya Zemlya, has experienced pronounced warming in recent decades due to disappearing sea ice (e.g. Screen and Simmonds, 2010; Lind et al., 2018). For example, the Svalbard archipelago has the strongest observed warming in Europe since the 1960's, with temperatures increasing at a rate of  $0.5^{\circ}\text{C decade}^{-1}$  (Nordli et al., 2014). Even under the moderate RCP4.5 emission scenario, which projects a global temperature increase of  $1.1 - 2.6^{\circ}\text{C}$  by 2100 relative to the 1986-2005 period, temperatures in the Barents Sea region are projected to increase by  $5-9^{\circ}\text{C}$  (AMAP, 2017).

30 Although the volumes of ice on Svalbard and the Russian Arctic are only equivalent to a global sea level rise of about 15 mm (Fürst et al., 2018) and 32 mm (Farinotti et al., 2019), respectively, they are estimated to be some of the most important regional contributors to sea level rise in the 21st century (e.g. Meier et al., 2007; Church et al., 2013; Hock et al., 2019). In addition to sea level rise, meltwater from retreating glaciers is important for river hydrology, fjord circulation, and terrestrial and marine ecosystems (e.g. Carroll et al., 2017; Hopwood et al., 2020).

35 While few glaciological measurements in the Russian Arctic are available, glaciological measurements of the surface mass balance (smb) have been conducted on Svalbard since the 1960's, and show an accelerating mass loss (e.g. Hagen et al., 2003; Schuler et al., 2020). However, these observations only exist in a small area, therefore, dedicated energy/mass balance models are an important tool to determine the mass balance of the whole archipelago.

40 The change in the climatic mass balance (cmb), which equals the smb plus refreezing in the firn column, has previously been estimated for Svalbard using energy balance models at different spatial and temporal resolutions (Lang et al., 2015; Aas et al., 2016; Østby et al., 2017; Van Pelt et al., 2019). Previous studies of the mass balance evolution primarily use energy balance models forced by either the ERA-Interim reanalysis product (Dee et al., 2011), the ERA-40 reanalysis product (Uppala et al., 2005), or ECMWF operational analysis, all of which are further downscaled to a 1-10 km resolution either using a regional climate model (e.g. Lang et al., 2015; Aas et al., 2016), statistical downscaling (e.g. Østby et al., 2017), or both (e.g. Van Pelt et al., 2019). Since the energy/mass balance models used in these studies are forced by similar global climate products, inter-model disagreements are due to uncertainties from the downscaling of the climate forcing, differences in physical parameterizations, or spatial resolution. The mass balance of the Russian Arctic has not previously been estimated using energy balance models, but has been simulated by various global temperature-index models (e.g. Radić et al., 2014; Hock et al., 2019).

50 In recent years, high-resolution simulations of the meteorological conditions over the Barents Sea region have become available. The high-resolution Copernicus Arctic Regional ReAnalysis (CARRA) dataset (Schyberg et al., 2020; Yang et al., 2021)

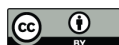

was published in 2021. It is a reanalysis product with a 2.5 km resolution, downscaled from ERA5 (Hersbach et al., 2020) by the state-of-the-art weather prediction model HARMONIE-AROME (Bengtsson et al., 2017). CARRA includes a number of improvements over ERA5, such as the assimilation of a large amount of additional surface observations, extensive use of satellite data, and an improved representation of sea ice. CARRA is likely the best high-resolution estimate of the meteorological parameters available in the Barents Sea region currently available due to the complex physics contained within the model and the large amount of assimilated data. Further downscaling is not required since it already contains such a high spatial resolution, which avoids introducing more uncertainties. In addition, the high-resolution AROME-ARCTIC numerical weather prediction system has provided forecasts over the Barents Sea region since late 2015 at 2.5 km resolution. AROME-ARCTIC is built upon HARMONIE-AROME, the same state-of-the-art weather prediction model as CARRA, but since it is a forecast product, it likely contains larger uncertainties in the estimates of the meteorological variables.

Here, we present a high-resolution (2.5 km) dataset of the glacial mass balance, runoff, refreezing, and seasonal snow amount of Svalbard from 1991-2022. The dataset is created using a full energy balance model forced by the CARRA reanalysis and AROME-ARCTIC forecasts. The produced dataset has the potential to provide near real-time forecasts of the mass balance and runoff in the region. We use Svalbard as a study region, as automatic weather stations and yearly mass balance surveys are available for evaluation of our model performance, while very few observations are available in the Russian Arctic. Using Holocene glacier records, Lubinski et al. (1999) found that glacier mass balance changes in the Russian Arctic closely mimic that of Svalbard, although the magnitude of mass change differs. We, therefore, expect a model that performs well for Svalbard will also provide a high-quality dataset for the Russian Arctic.

The mass balance simulations are conducted using CryoGrid, a model for simulating the terrestrial cryosphere (Westermann et al., 2022). CryoGrid simulates the energy and mass balance of both seasonal snow and glaciers, and estimates permafrost in non-glaciated areas.

For the first time, we use the novel, high-resolution CARRA reanalysis (Schyberg et al., 2020) as well as AROME-Arctic forecasts as forcing for mass balance simulations on Svalbard. Although other products based on HARMONIE-AROME have successfully been used as forcing for mass balance simulations in the Arctic (e.g. Mottram et al., 2017; Schmidt et al., 2018), neither AROME-ARCTIC nor CARRA have previously been validated for use in mass balance simulations. We therefore thoroughly evaluate both forcings against available observations, and compare the results from both simulations for the period they overlap. Lastly, the CryoGrid model results are evaluated against available observations of mass balance, both from in-situ campaigns and geodetic methods.

## 2 Study area

Located in the Norwegian Arctic between 75 and 81°N, the Svalbard archipelago is currently in one of the fastest warming regions in the world (e.g. Nordli et al., 2014; Isaksen et al., 2016). With a land area of ~60,000 km<sup>2</sup>, of which about 57% is covered by glaciers (Nuth et al., 2013), it contains about 10% of the glacier area in the Arctic, outside of the Greenland ice



sheet. The glacier types vary between small cirque and valley glaciers to large ice fields and ice caps, with more than 1000 individual mapped glaciers across the archipelago. Around 60% of the glacier area belong to tidewater glaciers (Błaszczuk et al., 2009) which introduce freshwater into the oceans through discharge from subglacial channels or calving at the glacier front. The highest elevations on Svalbard reach 1700 m a.s.l., but the hypsometry of glaciers peaks at 450 m a.s.l (Noël et al., 2020).

While the western side of the Archipelago is kept warm and humid by the Norwegian current, which brings warm Atlantic currents northwards along the western coast (Walczowski and Piechura, 2011), and warm and moist air from southerly flows, the eastern side is colder and drier, dominated by cold Arctic ocean current and dry and moist air masses originating in the north-east (Käsmacher and Schneider, 2011). Precipitation varies wildly across the archipelago, with the highest precipitation rates along in the south and along the west coast (Førland and Hanssen-Bauer, 2003; Winther et al., 2003; Førland et al., 2020). These patterns in temperature and moisture are reflected in the distribution of glaciers, with the largest glaciers found in the north-east and less extensive glacier coverage along the western side of Svalbard and in central Spitsbergen.

### 3 Methods and Data

#### 3.1 Methods

The simulations presented in this paper were created using the full energy balance model CryoGrid, which is forced by both CARRA reanalysis and AROME-ARCTIC forecasts. The workflow used is described below.

First, both the CARRA reanalysis and AROME-ARCTIC forecasts are evaluated against available observations from automatic weather stations. In addition, the consistency between the two forcings are evaluated for the overlap period (2016-2021). The results of this analysis is described in Supplement S2.

We then perform a 30-year spin-up of the CryoGrid model (described in section 4) for the glaciated gridpoints by repeating the 1991-2000 CARRA forcing to initialise the snow/ice temperature, density, and water content. Initially, the entire domain consists of temperate, pure glacier ice, i.e. the ice temperature of the entire column is 0°C. Tests were conducted with lower initial temperatures (-5°C), but it did not affect the temperature profile at the end of the spin-up. At the end of the spin-up period, the runoff, refreezing, subsurface temperatures and climatic mass balance reached stable values. For the non-glaciated land points, only a 2-year spin-up was used.

The energy/mass balance model CryoGrid is then used to simulate the mass balance components of both glaciers and seasonal snow from 1991-2021 using the CARRA reanalysis as forcing.

A second simulation with CryoGrid, this time forced by AROME-ARCTIC, is then conducted from 2016 to present. From 2016 until the summer of 2019, the AROME-ARCTIC model was initialized with too little snow over some glacier points in the ablation area, thus leading to unrealistically high surface and 2m temperatures. To counter this effect, we use the 10m temperature for the AROME-ARCTIC-forced simulation when unrealistically high surface temperatures occur. The AROME-ARCTIC-forced simulation is initialized from the CARRA-forced simulation at the end of 2015. Thus, the initial conditions

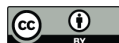

for the 2016-2021 period is identical for the two simulations. Lastly, the output from both CryoGrid simulations is evaluated against in-situ mass balance observations and geodetic estimates.

120 The AROME-ARCTIC-forced CryoGrid simulation is automatically updated on a daily basis. In this study, we present the simulations spanning until October 1st, 2022.

For the CryoGrid simulations, a fractional glacier mask is created by computing the percentage of glacier coverage in each grid point. The glacier coverage is based on the extent in the 2000s, based on the inventory of Nuth et al. (2013). Any points which have a fractional coverage between 10 and 90% are calculated with both the glaciated and non-glaciated land scheme. The final results are then weighted based on the fractional glacier coverage.

### 3.2 CryoGrid Model forcing

Meteorological forcing fields of 2m air temperature, specific humidity, incoming long- and shortwave radiation, pressure, and mass fluxes were obtained from both the Copernicus Arctic Regional ReAnalysis (CARRA) dataset (Schyberg et al., 2020; Yang et al., 2021) and AROME-ARCTIC weather forecasts (e.g. Müller et al., 2017).

CARRA is based on the non-hydrostatic numerical weather prediction model HARMONIE-AROME (Bengtsson et al., 2017). It uses ERA5 reanalysis (Hersbach et al., 2020) as boundary conditions and downscales it to a 2.5 x 2.5 km resolution over the European Arctic. The simulations are divided into two domains. Here we use the east domain, which contains Svalbard, Franz Josef Land, Novaya Zemlya and Northern Norway. CARRA currently spans the time frame from September 1990 to December 2021.

Similar to CARRA, AROME-ARCTIC (e.g. Müller et al., 2017) is also based on HARMONIE-AROME, and provides operational forecasts at a 2.5 x 2.5 km resolution over the Barents sea region. It uses ECMWF HRES forecasts as a lateral boundary conditions. The model has been operated by the Norwegian Meteorological Office since October 2015 and provides 66-hour forecasts with hourly resolution every 6-hours. Since this is a real-time forecast product, there are occasionally gaps in the forecast. When possible, we use the forecast initialized at 18UTC, as most data is assimilated at this time. We use a 6-hour lead time and extract data for 24 hours at a time, thus using forecast timesteps 6-30 for the simulations. This is chosen to optimise the prediction quality as well as to avoid spin-up effects. When the 18UTC forecast is not available, we use longer lead times of previous forecasts to find the most recent available estimate at a given hour. In the rare case that no forecast is available for the desired period, we simply interpolate between the previous and following available timestep.

145 Since CARRA and AROME-ARCTIC are on slightly different grids, we bilinearly interpolate the AROME-ARCTIC fields onto the CARRA grid in order for the final dataset to be consistent.

### 3.3 In-situ data

For evaluation of the AROME-ARCTIC and CARRA forcing data, observations from 26 Automatic Weather Stations (AWSs) are used: 6 stations on glaciers and 20 stations on non-glaciated land (see Fig. 1 and Table 1). The 20 stations on non-glaciated land are all operated by the Meteorological Office in Norway (MET-Norway) and have been assimilated into the AROME-

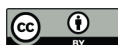

ARCTIC and CARRA products. The 6 glacier stations, on the other hand, have not been assimilated and thus provide independent reference. The glacier stations are located on: Etonbreen, operated by University of Oslo and the Norwegian Polar institute since 2004, (e.g. Schuler et al., 2014), Kongsvegen, operated since 2007 by the Norwegian Polar Institute (Kohler et al., 2017), Vestfonna, operated for two years between 2007-2009 by Uppsala University (Jonsell et al., 2010), and Nordenskiöldbreen and Ulvebreen, operated by Utrecht University since 2009 and 2015, respectively. The measurement interval was between 1-2 minutes, depending on the station. Daily mean observations of the 2m temperature, 2m relative humidity, 10m wind speed, and incoming and outgoing longwave and shortwave radiation is used for the evaluation, when available.

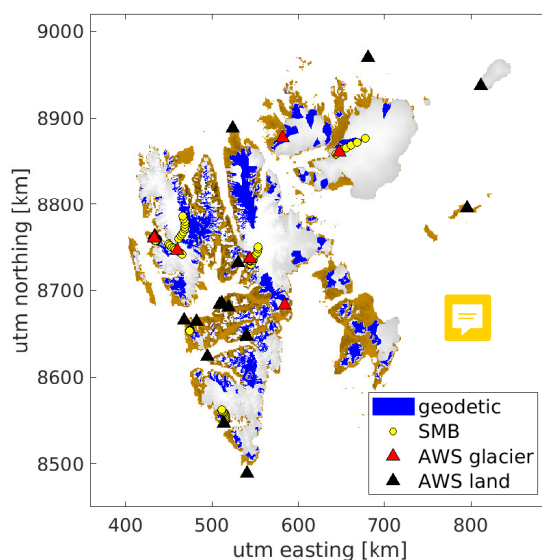

**Figure 1.** The location of the surface mass balance stakes and automatic weather stations used. The blue shaded areas are used for comparison with geodetic mass balance estimates.

In addition, observations from mass balance stakes are used for evaluation of the CryoGrid products. A total of 52 measurement points are used, spread over 8 glaciers and ice caps (Table 1 and Fig. 1). The stake heights are recorded once or twice a year (typically in April and September), and are converted into summer and winter mass balance estimates using snow density and snow depth data. Stake data on Austre Brøggerbreen (BRG), Midtre Lovénbreen (MLB), Kongsvegen (KNG), Høltedalfonna (HDF), and Linnébreen (LNB) have been collected by the Norwegian Polar Institute (e.g. Hagen et al., 1999), with the oldest record dating back to 1967. The Polish Academy of Sciences have measured mass balance stakes on Hansbreen (HBR) since 1989 (Grabiec et al., 2012). University of Oslo and the Norwegian Polar institute started mass balance measurements on Austfonna (AUS) in 2004 (e.g. Aas et al., 2016), while Uppsala and Utrecht universities initiated stake measurements on Nordenskiöldbreen (NSB) in 2006 (e.g. Van Pelt et al., 2012).



**Table 1.** In-situ data used for evaluation of the forcing and mass balance products. UiO: University of Oslo, NPI: Norwegian Polar Institute, IMAU: Institute for Marine and Atmospheric research Utrecht, PAN: Polish Academy of Sciences, UU: Uppsala University.

| Description                | Location            | Period used | Frequency      | Source   |
|----------------------------|---------------------|-------------|----------------|----------|
| Automatic Weather Stations | Etonbreen           | 2004 – 2020 | daily          | UiO      |
|                            | Kongsvegen          | 2007 – 2016 | daily          | NPI      |
|                            | Nordenskiöldbreen   | 2009 – 2020 | daily          | IMAU     |
|                            | Ulvebreen           | 2015 – 2020 | daily          | IMAU     |
|                            | Vestfonna           | 2007 – 2009 | daily          | UU       |
| Mass balance stakes        | Austre Brøggerbreen | 1991 – 2018 | summer, winter | NPI      |
|                            | Midtre Loveenbreen  | 1991 – 2018 | summer, winter | NPI      |
|                            | Kongsvegen          | 1991 – 2018 | summer, winter | NPI      |
|                            | Hansbreen           | 1991 – 2012 | summer, winter | PAN      |
|                            | Holtedahlfonna      | 2003 – 2018 | summer, winter | NPI      |
|                            | Linnébreen          | 2004 – 2010 | summer, winter | NPI      |
|                            | Etonbreen           | 2004 – 2018 | summer, winter | UiO, NPI |
|                            | Nordenskiöldbreen   | 2006 – 2018 | summer, winter | IMAU, UU |

### 3.4 Satellite observations

In addition to the in-situ measurements of mass balance performed by stake measurements, we use estimates of the geodetic mass balance for validation of the CryoGrid product. The geodetic mass balance is found by taking the difference between elevation data at different dates to find the change in volume. This volumetric change is then converted into mass balance by assuming a value for the bulk density. Unlike the climatic mass balance estimates provided in this study, geodetic mass balance includes frontal ablation from marine terminating glaciers. Therefore, we only compare our results to the geodetic balance of land-terminating glaciers.

Several studies have provided estimates of the geodetic mass balance of glaciers in Svalbard (e.g. Moholdt et al., 2010; Nuth et al., 2010), but here we use the estimate by Hugonnet et al. (2021) which used Advanced Spaceborne Thermal Emission and Reflection Radiometer (ASTER) imagery for determining the geodetic mass balance of all glaciers on Earth from 2000-2019. The results are available for all glaciers in the Randolph Glacier Inventory (Pfeffer et al., 2014) at a temporal resolution of 1, 2, 4, 5, 10, and 20 years. Here, we use the 5 year mass balance estimate for all land-terminating glaciers in Svalbard for model comparison (see Fig. 1).



## 180 4 CryoGrid community model

In this study we use and further develop the CryoGrid community model for simulations of the climatic mass balance and meltwater runoff. CryoGrid is an open-source model developed for climate-driven simulations in the terrestrial Cryosphere.

The model has a modular structure, with many different modules that can be added together in various combinations to represent a wide range of surface and subsurface conditions. Information about the different functionalities and structures are described

185 in detail in Westermann et al. (2022).

Three modules are used to determine the stratigraphy of glaciers in Svalbard: a glacier (ice) module, a firn module and a snow module (see Fig. 2). The main components of each module are described below. All modules use the surface energy balance as an upper boundary condition. For simulations of seasonal snow, a simple ground module and a snow module is used (see Westermann et al. (2022) for details on the ground module).

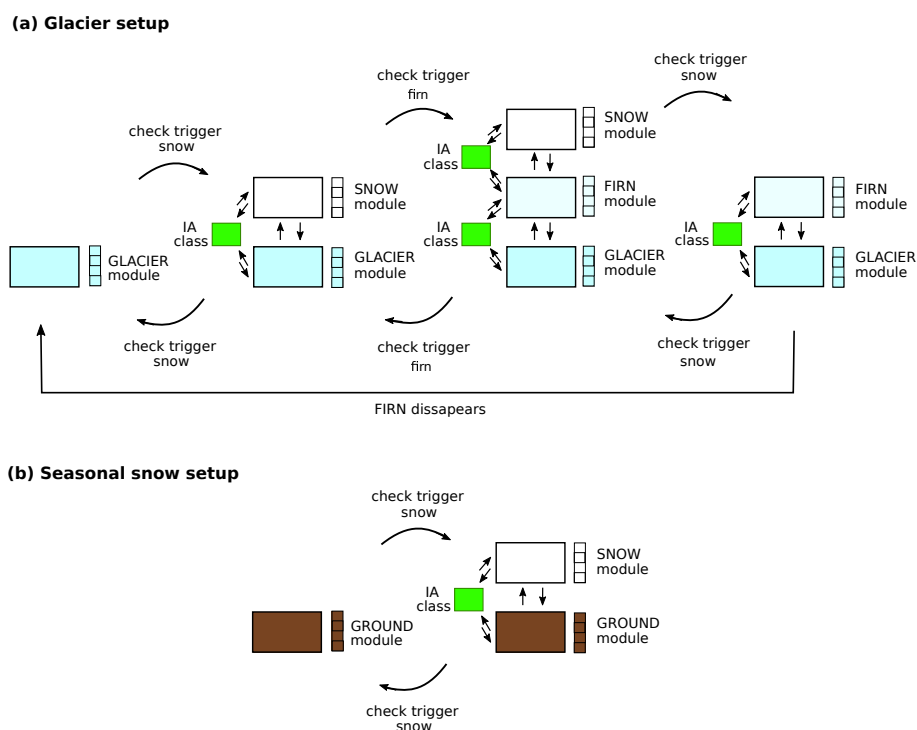

**Figure 2.** Evolution of CryoGrid stratigraphy for simulation of (a) glacier mass balance and (b) seasonal snow in this study. For glacier grid points (a), the model stratigraphy consists of up to three modules, which can be combined to represent the following four situations: glacial ice, glacial ice covered with snow, glacial ice covered by firn and snow, and glacial ice covered by firn. Between each module there is an interaction (IA) class, which determines the transfer of heat, water, and mass. A trigger function determines when modules can be added or removed from the stratigraphy. For seasonal snow (b), there is a ground module which can be coupled to a snow module.



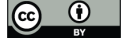

## 190 4.1 Glacier module

The glacier module consists of layers of pure-ice with a user-defined constant ice thickness. For this study, 47 layers with a thickness between 0.1 and 1 m were used, totaling 20 m of ice. We assume an ice albedo of 0.4 for all of Svalbard. When mass is removed from the model by runoff, evaporation or sublimation, mass is shifted up from an infinite ice reservoir below into the lowest model layer. This is done to prevent the glacier from disappearing during long spin-ups due to the lack of ice flow.

195 The infinite reservoir is assumed to have the same temperature as the lowest model layer. If there is no snow on the surface, any excess water from rain or melt runs off instantaneously.

## 4.2 Snow and firn module

If snowfall is added to the model, a snow module is added on top of the glacier ice or firn (see Fig. 2). If the snow survives on the glacier surface for more than one year, the snow layer is moved to a firn scheme. The snow and firn scheme have almost  
200 the same model physics, but new snow will never be mixed with a firn layer. The snow and firn modules follow a slightly altered CROCUS (Vionnet et al., 2012) snow scheme as described in Westermann et al. (2022). For this study, we mostly follow this scheme but with updated runoff and water percolation schemes. These modifications are described below, while a brief description of the albedo, temperature diffusion, and densification are given in Supplement S1.

### 4.2.1 Water percolation and runoff

205 The water in a grid cell is either immobile and bound to the snow or firn, or it flows downwards driven by gravity. The limit between the two regimes is the field capacity  $\theta_{fc}$ , in this study chosen as 0.05. The vertical water flux  $q_w$  [ $\text{m s}^{-1}$ ] is therefore given by

$$q_w = \begin{cases} -K & \text{for } \theta_w > \theta_{fc} \\ 0 & \text{for } \theta_w \leq \theta_{fc} \end{cases} \quad (1)$$

where  $K$  is the hydraulic conductivity [ $\text{m s}^{-1}$ ] and  $\theta_w$  is the water saturation. The hydraulic conductivity is parameterized in  
210 terms of the snow grain diameter  $d$  [m], the snow density  $\rho_s$ , and the effective liquid saturation  $\Theta = (\theta_w - \theta_{fc}) / (1 - \theta_{fc})$ .

The hydraulic conductivity of snow is the product of the unsaturated conductivity,  $K_r$ , and saturated conductivity,  $K_s$ , i.e.  $K = K_s K_r$ . The saturated hydraulic conductivity (Shimizu, 1970) is given by

$$K_s = 0.077 \frac{g}{v_w} d_g^2 \exp(-0.0078 \rho_s) \quad (2)$$

where  $g$  is the gravitational acceleration [ $\text{m s}^{-2}$ ] and  $v_w = 1.787 \cdot 10^{-6} \text{ m}^2 \text{ s}^{-1}$  is the kinematic viscosity of water. The unsat-  
215 urated hydraulic conductivity (van Genuchten, 1980) is given by

$$K_r = \Theta^{0.5} \left[ 1 - \left( 1 - \Theta^{1/(1-1/n)} \right)^{1-1/n} \right]^2 \quad (3)$$



where the parameter  $n$  is given by

$$n = 15.68 \exp(-460d_g) + 1. \quad (4)$$

Water is not allowed to flow into an impermeable layer, here defined as layers with a density higher than  $830 \text{ kg m}^{-3}$  (Cuffey and Paterson, 2010), or a layer that already has its entire pore space filled. Water which would have otherwise flowed into an impermeable layer becomes available to run off. Runoff does not occur immediately, but depends on a characteristic local runoff scale  $\tau_R$  [days] which increases with surface slope  $S$  [ $\text{m m}^{-1}$ ] as follows,

$$\tau_R = c_1 + c_2 \exp(-c_3 S) \quad (5)$$

where  $c_1 = 0.33$  day,  $c_2 = 25$  days, and  $c_3 = 140$  (Lefebvre et al., 2003). The runoff per timestep  $R$  [m w.e.] is then calculated from the water in excess of the field capacity  $W_{ex}$  [m], as

$$R = W_{ex} \frac{\Delta t}{\tau_R} \quad (6)$$

where  $\Delta t$  is the time step in days. This delay in runoff means that water in excess of irreducible saturation may linger in a layer until it either refreezes or runs off.

#### 4.2.2 Vertical discretization

To avoid very thin snow layers, a simplified gridding scheme is used (Zweigel et al., 2021). During each timestep, new snow is added to the uppermost grid cell by calculating a weighted average between all variables describing the new and old snow (density, snow age, snow grain size etc). The water equivalent volume of snow is used as the weighting factor. When the top grid cell exceeds a target snow water equivalent (here 0.02 m) by more than 50%, it is split in two. If the top grid cell is smaller than 50% of the target snow water equivalent, it is merged with the below cell. The grid size of the top snow cell is therefore in the order of 0.01-0.03 m w.e. For deeper snow layers, the layer size doubles every 10 layers by splitting/merging of layers.

For the firn modules, the top layer has a maximum snow water equivalent thickness of 0.1 m, and the layer size doubles every 10 layers by merging/splitting of layers. Freshly fallen snow will always fall on top of the firn and never be mixed in with the top layer.

## 5 Results: Dataset description and validation

This section describes the significant trends in the meteorological variables produced by the CARRA data set as well as evaluates the CARRA and AROME-ARCTIC forcing data sets. It then presents the validation of the glacial mass balance of each CryoGrid simulation against in-situ observations as well as the results of the climate mass balance of the CryoGrid simulations forced with CARRA and AROME-ARCTIC.

### 5.1 Trends in CARRA meteorological variables

245 Figure 3 shows the average yearly temperature and precipitation in CARRA over 1991-2021, as well as significant trends ( $p < 0.05$ ) in both variables. The average temperature over Svalbard land areas is  $-7.9^{\circ}\text{C}$ , with the highest average annual temperatures over low-elevation non-glaciated land (up to  $-2.0^{\circ}\text{C}$ ), and the lowest temperatures over high-elevation glacier points (down to  $-12.8^{\circ}\text{C}$ ). There is a significant positive trend in the temperature in all points ( $p < 0.05$ ), with an average trend of  $1.4^{\circ}\text{C decade}^{-1}$  ( $p < 0.01$ ). The largest trends are in the east of Svalbard (up to  $2.4^{\circ}\text{C decade}^{-1}$ ), while the lowest trend is  
 250 along the west coast (down to  $1.0^{\circ}\text{C decade}^{-1}$ ).

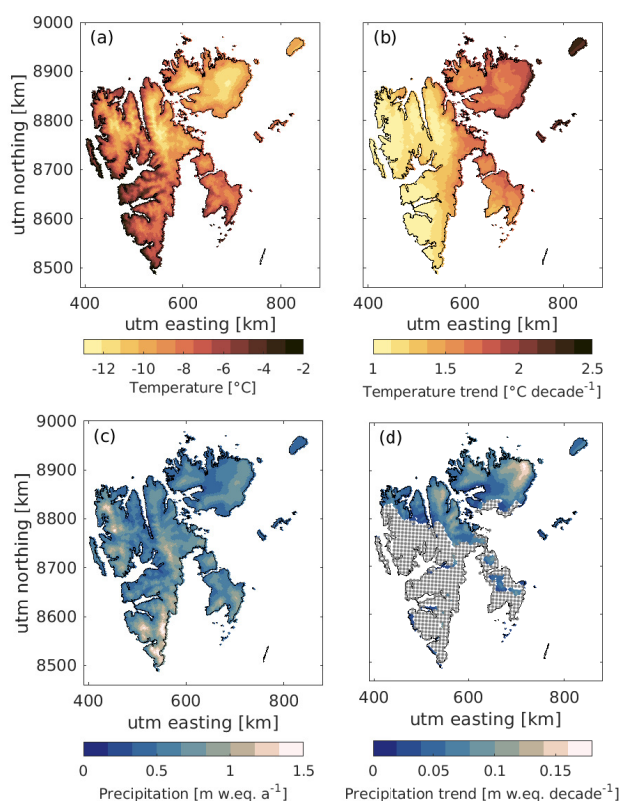

**Figure 3.** Average a) 2m-temperature and c) precipitation over 1991-2021 in CARRA. Significant ( $p < 0.05$ ) b) temperature and d) precipitation trend in each points. Stippled areas have no significant trend.

The average precipitation over Svalbard is  $0.62 \text{ m w.e. yr}^{-1}$ . There is a small but significant trend in the average yearly precipitation of  $0.05 \text{ m w.e. decade}^{-1}$  ( $p < 0.01$ ). Although there is no significant trend for all areas of Svalbard, there is a positive trend over e.g. Austfonna, Vestfonna, and North Spitsbergen. The largest trend is over NE Austfonna of  $0.17 \text{ m w.e. decade}^{-1}$ .



## 5.2 Evaluation

### 255 5.2.1 Forcing evaluation

The evaluation of both forcing products against available AWS observations shows that both models generally fit well with observations, but that the bias and root-mean-square-error of the CARRA product is generally smaller than for AROME-ARCTIC. For detailed evaluation of the model forcing against available AWS observations for both CARRA and AROME-ARCTIC, in addition to a discussion on the inter-comparison, we refer to Supplement S2,S3.

### 260 5.2.2 Mass balance evaluation

Mass balance,  $b$ , from stakes on eight glaciers in Svalbard is compared to the CryoGrid simulations of the surface mass balance in Table 2. Here, the surface mass balance is defined as the mass balance in the annual layer, and thus does not include refreezing in firn. The difference in mass balance,  $\Delta b$ , is defined as the modeled value minus the observed value at a given location.

**Table 2.** Evaluation of modelled results against observations from mass balance stakes in  $\text{m w.e. yr}^{-1}$ . The values from 1991/92-2017/18 shows the comparison with CARRA-forced model simulation, while for 2016/17-2017/18 the observations are compared to simulations using both CARRA and AROME-ARCTIC forcing. The results are given as CARRA forcing / AROME-ARCTIC forcing. Subscripts  $w$ ,  $s$ , and  $a$ , respectively, refer to values calculated for winter months, summer months and annually.

| Period               | Location            | stakes | $\Delta b_w$       | rmse $b_w$         | $\Delta b_s$         | rmse $b_s$         | $\Delta b_a$         | rmse $b_a$         |
|----------------------|---------------------|--------|--------------------|--------------------|----------------------|--------------------|----------------------|--------------------|
| 1991/92 -<br>2017/18 | Austre Brøggerbreen | 3      | -0.18              | 0.21               | -0.22                | 0.47               | -0.41                | 0.60               |
|                      | Midtre Lovénbreen   | 2      | -0.24              | 0.28               | 0.06                 | 0.24               | -0.18                | 0.35               |
|                      | Kongsvegen          | 9      | -0.08              | 0.17               | -0.11                | 0.28               | -0.19                | 0.35               |
|                      | Hansbreen           | 9      | -0.32              | 0.41               | -0.06                | 0.45               | -0.38                | 0.68               |
|                      | Holtedahlfonna      | 10     | -0.04              | 0.13               | 0.05                 | 0.25               | 0.007                | 0.30               |
|                      | Linnébreen          | 1      | -0.15              | 0.17               | 0.18                 | 0.25               | 0.03                 | 0.19               |
|                      | Etonbreen           | 7      | -0.05              | 0.12               | 0.04                 | 0.19               | -0.02                | 0.21               |
|                      | Nordenskiöldbreen   | 11     | 0.12               | 0.21               | -0.08                | 0.42               | 0.03                 | 0.47               |
| <b>Total</b>         | -                   | -      | <b>-0.08</b>       | <b>0.21</b>        | <b>-0.01</b>         | <b>0.31</b>        | <b>-0.09</b>         | <b>0.39</b>        |
| 2016/17 -<br>2017/18 | Austre Brøggerbreen | 1      | -0.11 / -0.11      | 0.11 / 0.12        | -0.32 / -0.23        | 0.32 / 0.27        | -0.43 / -0.34        | 0.43 / 0.36        |
|                      | Midtre Lovénbreen   | 2      | -0.19 / -0.21      | 0.20 / 0.24        | -0.09 / -0.10        | 0.16 / 0.22        | -0.28 / -0.31        | 0.29 / 0.32        |
|                      | Kongsvegen          | 6      | -0.02 / -0.08      | 0.09 / 0.13        | -0.29 / -0.27        | 0.34 / 0.33        | -0.32 / -0.35        | 0.43 / 0.37        |
|                      | Holtedahlfonna      | 10     | 0.12 / 0.10        | 0.17 / 0.16        | -0.05 / -0.04        | 0.26 / 0.29        | 0.06 / 0.05          | 0.31 / 0.30        |
|                      | Etonbreen           | 7      | -0.02 / 0.02       | 0.07 / 0.07        | 0.12 / 0.14          | 0.16 / 0.19        | 0.11 / 0.16          | 0.14 / 0.19        |
|                      | Nordenskiöldbreen   | 11     | 0.24 / 0.32        | 0.29 / 0.37        | -0.19 / 0.15         | 0.46 / 0.46        | 0.05 / 0.47          | 0.48 / 0.65        |
| <b>Total</b>         | -                   | -      | <b>0.06 / 0.07</b> | <b>0.18 / 0.22</b> | <b>-0.11 / -0.14</b> | <b>0.29 / 0.35</b> | <b>-0.05 / -0.10</b> | <b>0.33 / 0.42</b> |



Table 2 and Fig. 4 compare the stake observations and the nearest model gridpoint value for the CARRA-forced CRYOGRID  
265 simulations. Overall, there is a good agreement between the model and the observations, with biases and root-mean-square  
errors **similar to those found** in other modeling studies (e.g. Østby et al., 2017; Van Pelt et al., 2019). The largest difference  
in the winter mass balance occurs at Hansbreen (Fig. 4e) where the model has a large negative bias at all stake locations  
except at the lowest and highest elevations. There is also a negative bias in the summer mass balance at the low elevation  
stations, but there is good agreement at glacier stations at higher elevations. The largest average difference in summer occurs at  
270 Austre Brøggerbreen, where the CARRA-forced simulation underestimates the mass balance by 0.22 m w.e. on average. Note,  
however, that both Hansbreen and Austre Brøggerbreen are small glaciers in complex topography, and thus may not be well  
represented by the the 2.5 x 2.5 resolution of these simulations.

Table 2 also contains the comparison between the stake observations and the nearest model gridpoint for the AROME-  
ARCTIC-forced simulations. Only the 2016/17 and 2017/18 glaciological years were used for this evaluation. Overall, the  
275 CARRA and AROME-ARCTIC forced simulations perform almost equally well over these two years, with similar biases and  
root-mean-square errors for both the summer and winter balance. There is, however, a larger difference between the estimates of  
the annual mass balance, primarily due to large differences in the simulations for Nordenskiöldbreen when using the different  
forcings. **For the CARRA forced runs for 2016/17-2017/18, the overestimation in the mass balance of Nordenskiöldbreen**  
during the winter is balanced by excess melt during the summer, leading to only a small bias in the annual comparison. Using  
280 AROME-ARCTIC, the mass balance of Nordenskiöldbreen is underestimated both in summer and winter, leading to a large  
bias and rmse in the annual comparison.

In addition to the in-situ mass balance, we use estimates of the geodetic mass balance of land-terminating glaciers by  
Hugonnet et al. (2021) to validate the mass balance results. Since the geodetic estimates include refreezing below the annual  
layer, we here use the climatic mass balance for the comparison. Figure 5 compares the cmb from CryoGrid for five year periods  
285 between 2000 and 2020 against estimates from Hugonnet et al. (2021). The simulated cmb is within the uncertainty estimate of  
the geodetic data for the whole period, **except in 2005-2009 where the cmb is slightly higher than the uncertainty estimate** (by  
0.02 m w.e. yr<sup>-1</sup>). The AROME-ARCTIC-forced simulations are within the uncertainties of the geodetic estimate, but have  
a slightly lower mass balance than the CARRA-forced simulations for the same period (-0.29 m w.e. yr<sup>-1</sup> using CARRA vs.  
-0.34 m w.e. yr<sup>-1</sup> using AROME-ARCTIC.)

### 290 5.3 Climatic mass balance

The area-averaged climatic mass balance of all Svalbard glaciers for the whole CARRA simulation period is found to be -0.08  
m w.e. Fig. 6a-c show the annual, winter, and summer climatic mass balance over Svalbard. The results are shown for each  
mass balance year, here defined as **September to August**. The most negative values are found at low-elevation areas in S and  
SW Spitsbergen (Fig. 6a), with the cmb reaching down to -3.23 m w.e. yr<sup>-1</sup>, while the most positive values are found at high-  
295 elevation areas in central Spitsbergen, reaching a maximum cmb of 1.16 m w.e. yr<sup>-1</sup>. The winter mass balance (Fig. 6b) is on  
average positive **in** all points, while the summer mass balance (Fig. 6c) is negative except **in** some high-elevation points in NE  
and NW Spitsbergen.

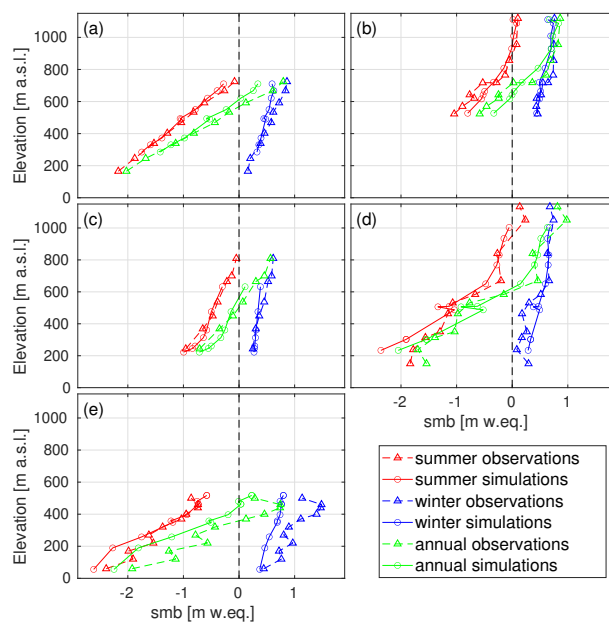

**Figure 4.** Average simulated (CARRA) and observed mass balance from 1991-2018 at each stake location for (a) Kongsvegen, (b) Holtedahlfonna, (c) Etonbreen, (d) Nordenskiöldbreen, and (e) Hansbreen.

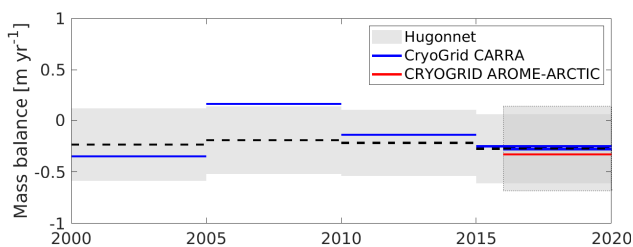

**Figure 5.** Geodetic mass balance of land terminating glaciers (from Hugonnet et al. (2021)) compared to the climatic mass balance simulated in CryoGrid.

Figure 6d shows the temporal evolution of the summer, winter, and annual cmb. The most positive cmb (0.43 m w.e.) was found in the 2007/08 mass balance year, while the most negative cmb (-0.68 m w.e.) was found in 2019/20.

300 The winter cmb is on average 0.44 m w.e. yr<sup>-1</sup>, with a maximum in 2015/16 (0.65 m w.e.) and a minimum in 2001/02 (0.28 m w.e.). The summer cmb is on average -0.52 m w.e. yr<sup>-1</sup>, with the most negative value in 2020 (-1.0 m w.e.) and the least negative value in 2007/08 (-0.19 m w.e.). There is no significant trend in winter, summer, or annual cmb over the investigated period.

305 Figure 6d shows the results using both CARRA and AROME-ARCTIC forcing. Generally, the AROME-ARCTIC simulations contain slightly lower winter cmb, with an average difference of -0.04 m w.e.. The summer cmb is more variable, but

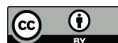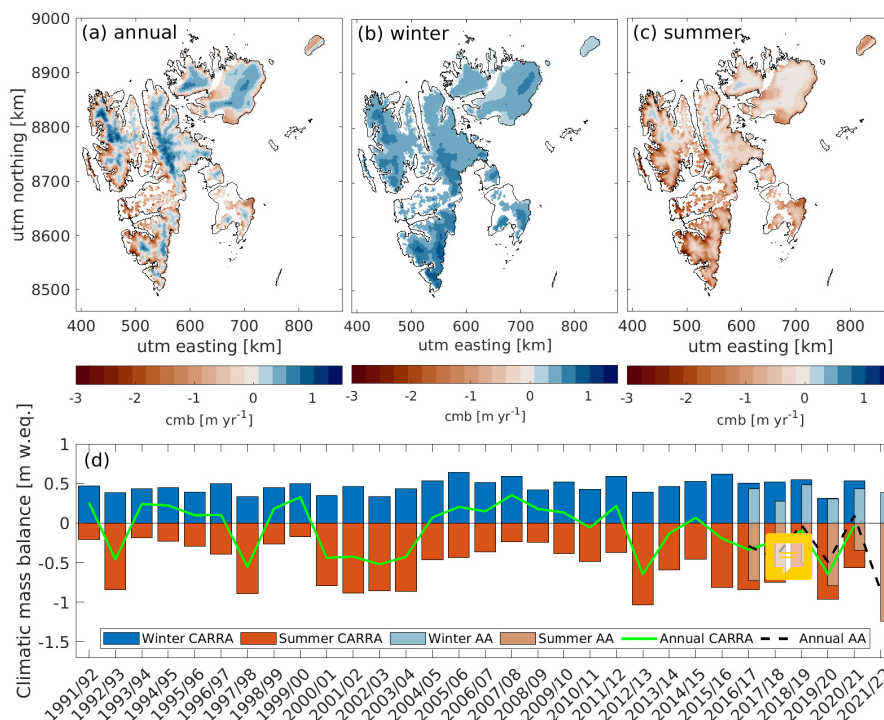

**Figure 6.** Climatic mass balance of Svalbard from 1991/92 to 2020/21. The top row contains maps of the average (a) annual, (b) winter, and (c) summer cmb, while (d) shows the temporal evolution of the summer, winter and annual cmb for each mass balance year (September - August). Dark red and blue show the results using CARRA forcing, while lighter colored bars show the results using AROME-ARCTIC (denoted AA).

generally the values in the AROME-ARCTIC simulations are more negative than CARRA (by  $-0.05$  m w.e. on average). Overall, the annual cmb is similar in the two simulations, but with a more negative cmb when using AROME-ARCTIC of about  $-0.1$  m w.e. from 2016-2017, and a more positive cmb when using AROME-ARCTIC in 2019-2021 of approximately  $0.1$  m w.e.. Based on AROME-ARCTIC, 2021/22 appears to be a record negative mass balance year for Svalbard.

310

Figure 7 shows the winter (blue bars), summer (red bars), and annual cmb (green line) for eight different regions of Svalbard. The glaciers in Nordenskiöldland have the most negative annual cmb ( $-0.73$  m w.e.  $\text{yr}^{-1}$ ), with glaciers losing mass during all years except 2007/08. The most positive average cmb is in NE Spitsbergen ( $0.11$  m w.e.  $\text{yr}^{-1}$ ). For all areas, 2012/13 was a year with a strongly negative summer cmb. In 2019/20, NW-Spitsbergen experienced a record amount of melt ( $-1.37$  m w.e.) in combination with a record low winter cmb ( $0.18$  m w.e.). Most other regions also experienced strong summer melt, with the exception of Edgeøya and Barentsøya where the summer cmb is close to the average over the simulation period.

315

Kvitøya, Barentsøya/Edgeøya, and Nordenskiöldland all have a significant negative trend in the annual cmb of  $-0.17$ ,  $-0.22$ , and  $-0.27$  m w.e.  $\text{decade}^{-1}$ , respectively. The other regions also have negative trends, but they are not significant at a 95% con-

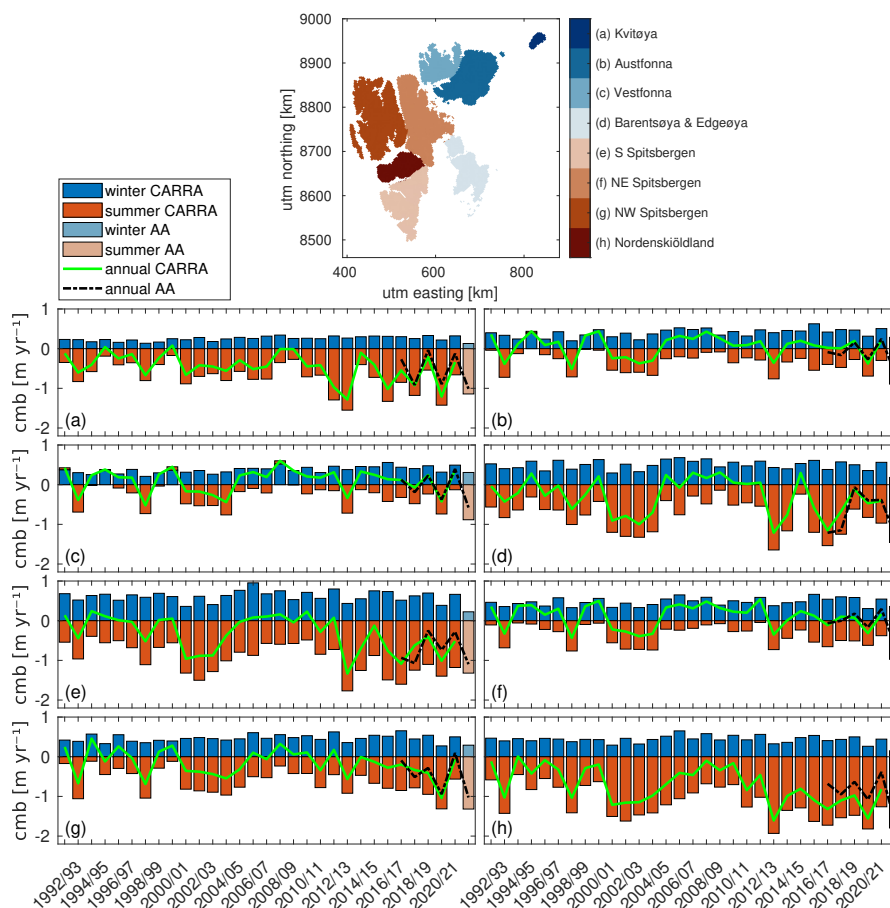

**Figure 7.** Climatic mass balance for different regions of Svalbard. Dark red bars show the summer balance and dark blue bars show the winter balance calculated with CARRA forcing. The lighter colored bars from 2021/22 is the climatic mass balance calculated with AROME-ARCTIC forcing. The green line is the yearly cmb simulated using CARRA forcing, while the black line is the yearly cmb using AROME-ARCTIC.

confidence interval. There is a small, but significant, positive trend in the winter cmb of  $0.05 \text{ m w.e. decade}^{-1}$  for both Austfonna and Vestfonna, but no significant trend is found for the other areas. Kvitøya ( $-0.19 \text{ m w.e. decade}^{-1}$ ), S Spitsbergen ( $-0.18 \text{ m w.e. decade}^{-1}$ ), and Nordenskiöldland ( $-0.22 \text{ m w.e. decade}^{-1}$ ) have significant negative trends in the summer balance.

Figure 7 also show the yearly cmb of each region calculated with AROME-ARCTIC (black line). For most regions, the cmb simulated using AROME-ARCTIC closely matches that of CARRA, although large deviations for Nordenskiöldland exist (Fig. 7h). For the other regions, the average difference between the CARRA and AROME-ARCTIC estimates is  $< 0.10 \text{ m w.e.}$ , while for Nordenskiöldland it is  $0.41 \text{ m w.e.}$ . For 2021/22, the AROME-ARCTIC forced simulations show a highly negative mass balance in all regions.





## 5.4 Seasonal snow

During the summer season, the non-glaciated land areas on Svalbard experience snow-free conditions. The length of the snow-free season depends on the snow disappearance day and the snow onset day, defined as when the snow thickness first drops below (snow disappearance) or above (snow onset) a certain threshold. Here, we set the threshold to 1 cm.

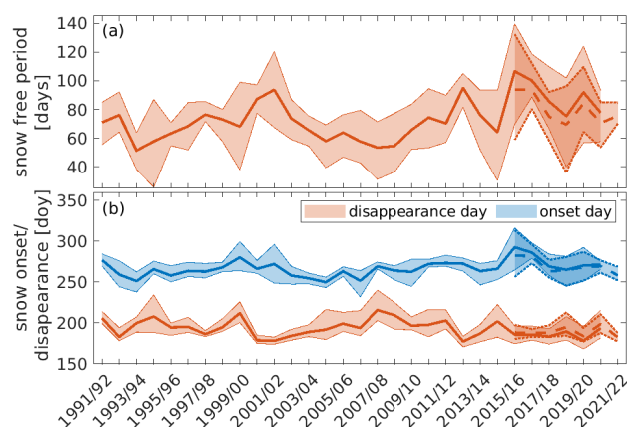

**Figure 8.** a) The length of the snow free period and b) the snow disappearance and snow onset date. In both plots, the thick lines shows the average for all non-glaciated land on Svalbard using CARRA forcing, while the stippled line shows the average using AROME-ARCTIC. The colored areas show the span in values for the different regions of Svalbard (see Fig. 7), i.e. the top line shows the region with the maximum average disappearance/onset date and the lower line shows the region with the minimum average disappearance/onset date.

During the simulation period, no significant trend is found for the snow disappearance date. There is, however, a significant trend in the snow onset date of  $4.0 \text{ days decade}^{-1}$  ( $p=0.05$ ) and the length of the snow-free season of  $6.8 \text{ days decade}^{-1}$  ( $p=0.02$ ) (Fig. 8).

When considering the different regions as defined in Fig. 7, we find that some areas show significant trends in the snow onset or disappearance date. Nordenskiöldland has a significant trend in both the snow disappearance date ( $-5.7 \text{ days decade}^{-1}$ ,  $p < 0.01$ ), and the snow free period ( $11.0 \text{ days decade}^{-1}$ ,  $p < 0.01$ ). NW Spitsbergen, there is a significant trend in the snow onset date ( $4.3 \text{ days decade}^{-1}$ ,  $p=0.02$ ) and the snow free period ( $7.2 \text{ days decade}^{-1}$ ,  $p < 0.01$ ). S. Spitsbergen there is a trend in the snow disappearance date ( $-6.2 \text{ days decade}^{-1}$ ,  $p < 0.01$ ) and the snow free period ( $10.6 \text{ days decade}^{-1}$ ,  $p < 0.01$ ).

The simulations using AROME-ARCTIC forcing give similar results as those using CARRA for the snow free period, snow onset date, and snow disappearance date. The snow free period is shorter by on average 8.4 days when using AROME-ARCTIC, which is due to a slightly later snow disappearance date (on average 4.2 days later) and a slightly earlier snow onset date (on average 4.2 days earlier).



## 5.5 Refreezing

Refreezing is defined as all liquid water that refreezes within snow and firn, without taking into account that this may melt again. The average annual refreezing for glacier-covered and land areas is 0.24 m w.e. and 0.11 m w.e., respectively. The lowest annual refreezing is simulated at low elevations, where only thin seasonal snowpacks are present, thus limiting the amount of refreezing. The largest refreezing is found in the accumulation zones (Fig. 9), where average values up to 0.32 m w.e. yr<sup>-1</sup> are simulated. In these areas, water can percolate down into firn layers and refreeze over the winter season. The spatial distribution of this internal accumulation (defined as refreezing beneath the annual layer) is shown in Fig. 9b, showing that a significant fraction of the refreezing at higher elevations occurs in deeper layers. The average annual internal accumulation is 0.11 m w.e., and thus accounts for almost half of the total refreezing (Fig. 9c). There is a significant negative trend in the refreezing within glaciers of -13 mm w.e. decade<sup>-1</sup> (p < 0.01), which is primarily due to a decrease in internal accumulation.

For glacier-covered areas, annual refreezing of melt and rainwater accounts for 25% of the total accumulation, varying between 19% and 32% over the simulation period. There is a significant negative trend in the contribution of refreezing to the total accumulation of -2.1% decade<sup>-1</sup> (p < 0.01).

There is a higher amount of refreezing in the AROME-ARCTIC-forced simulations between 0.01-0.05 m w.e. yr. This is most likely due to the higher temperatures in AROME-ARCTIC over some glaciers, leading to higher amounts of liquid precipitation in the spring and autumn. The internal accumulation is almost equal in the two simulations (the mean difference between the two simulation is <0.006 m w.e.). The amount of refreezing in seasonal snow is also similar overall, with an average difference of 0.01 m w.e.

## 5.6 Runoff

The simulated runoff from both glacier-covered and non-glaciated land points are shown in Fig. 10. The average runoff for glaciers has a similar pattern as the cmb (Fig. 6), with the highest runoff in low-elevation regions (up to 3.0 m w.e. yr<sup>-1</sup>) and lowest runoff in high-elevation areas in central Spitsbergen (down to 0.02 m w.e. yr<sup>-1</sup>).

The average total runoff from glacier-covered regions is 29 Gt yr<sup>-1</sup> and for land regions it is 12 Gt yr<sup>-1</sup>. While there is a large variation in runoff from glacier-covered regions, the runoff from land areas is relatively stable throughout the whole period (Fig. 10c). The minimum and maximum runoff from seasonal snow occurred in 1996 (9.5 Gt) and 2016 (19 Gt), respectively. For glacier covered areas, the minimum runoff occurred in 2008 (14.4 Gt), where the discharge was almost equal to that coming from seasonal snow. The runoff during this year was low for the entire Svalbard area, with particularly low rates along the Western coast. The largest runoff from glaciers occurred in 2013 (50.4 Gt), closely followed by 2020 (49.0 Gt). In 2013 there was generally high runoff over the entire peninsula compared to the average values, with especially large runoff rates in southern Spitsbergen and Barentsøya.

There is a significant, positive trend in both the glacier runoff and the runoff from seasonal snow of 5.2 Gt decade<sup>-1</sup> (p=0.01) and 1.1 Gt decade<sup>-1</sup> (p<0.01), respectively.

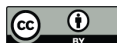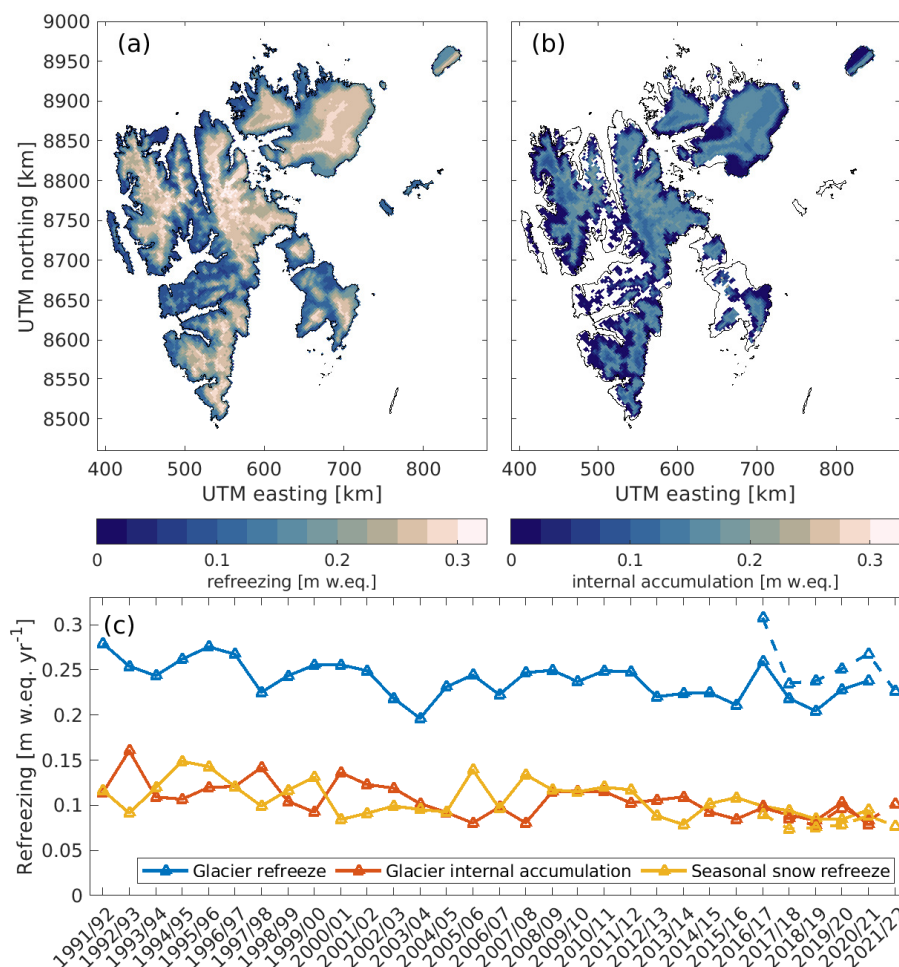

**Figure 9.** (a) Average annual refreezing for glaciers and seasonal snow on non-glaciated land areas. (b) Average annual internal accumulation from glacier-covered areas. (c) The temporal variation in refreezing and internal accumulation for glaciers and seasonal snow. Solid lines show the CARRA forcing and dashed lines show AROME-ARCTIC forcing.

375 Comparison to the runoff simulated using AROME-ARCTIC is shown in Fig. 10b,c. The glacier runoff is generally higher in the AROME-ARCTIC-forced simulations for SW Spitsbergen and Barentsøya/Edgeøya, and lower for Kvitøya and Nordenskiöldland. The average difference from 2016-2021 is 0.4 Gt yr<sup>-1</sup>, ranging between 2-6 Gt for individual years. The runoff from seasonal snow on non-glaciated land is also similar overall, with the average value from AROME-ARCTIC only slightly larger than CARRA by 0.6 Gt yr<sup>-1</sup>. Interestingly, although the glacier runoff is lower in the AROME-ARCTIC simulations for  
 380 Nordenskiöldland, the runoff from seasonal snow is not. This indicates that the difference between the CARRA and AROME-ARCTIC runoff estimates is not due to differences in precipitation.

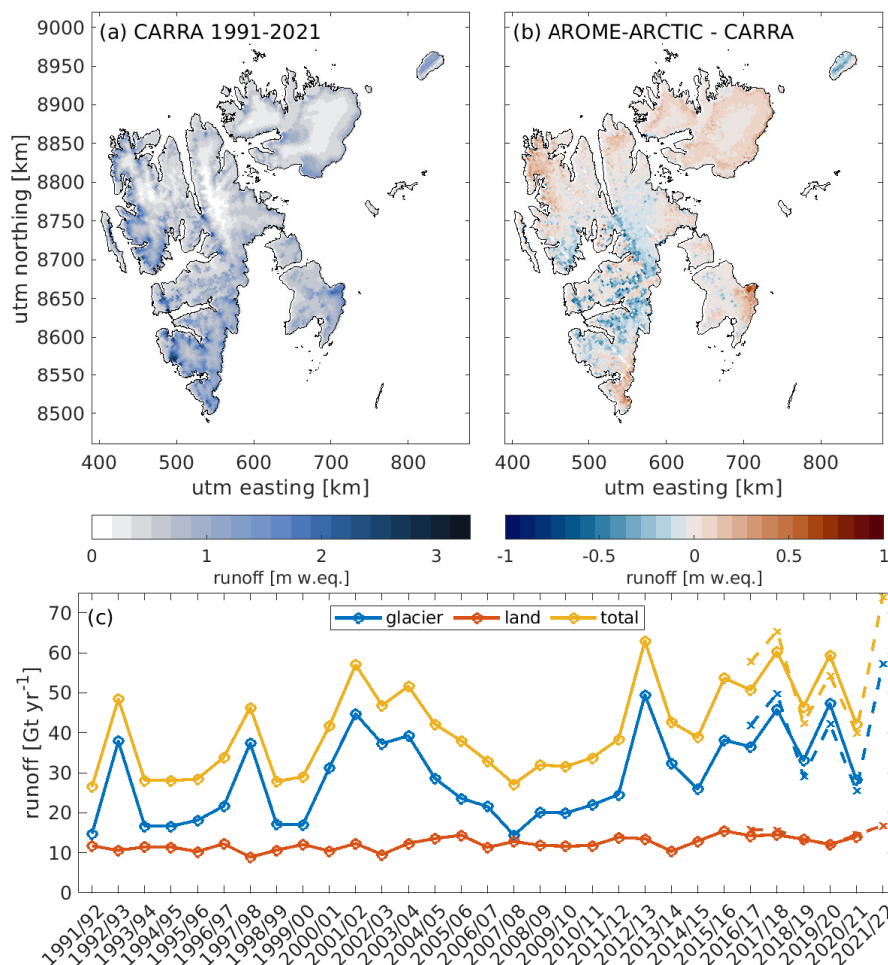

**Figure 10.** a) Average runoff over the whole CARRA simulation period (1991/92–2020/21). b) The difference in runoff between the AROME-ARCTIC and CARRA forced simulations from 2016–2021. c) Timeseries of runoff from glaciers and seasonal snow on non-glaciated land. Dashed lines show the results from the AROME-ARCTIC-forced simulations.

## 6 Discussion

### 6.1 Frontal ablation

The datasets presented in this paper only account for the climatic mass balance, and therefore do not include e.g. the mass loss from frontal ablation. However, by comparing the climatic mass balance estimate to the estimates of total mass balance from e.g. geodetic methods, one can reach a rough estimate of the mass loss due to calving. Similar to the model validation, we use the estimates from Hugonnet et al. (2021) but now include tidewater glaciers in the comparison. By subtracting the CARRA-forced simulated climatic mass balance from the geodetic estimate, we can get an estimate of the calving rate. These



390 estimated calving rates are up to  $-0.19 \text{ m yr}^{-1}$  in the early 2000s (2000-2004), followed by an increase in 2005-2009 with possible values between  $-0.15$  and  $-0.67 \text{ m yr}^{-1}$ . These numbers are consistent with the estimate by Błaszczyk et al. (2009) of  $-0.18 \text{ m yr}^{-1}$  from 2000-2006. In the first half of the 2010s, the calving rate is up to  $-0.43 \text{ m yr}^{-1}$ , while in the latter half it is up to  $-0.5 \text{ m yr}^{-1}$ . The large range in calving rates reflects the uncertainty in the geodetic estimate.

## 6.2 Almost real-time estimates with AROME-ARCTIC

395 As shown above, AROME-ARCTIC forcing generally produces results for the mass balance and runoff of Svalbard that is similar, within  $0.2 \text{ m w.e. yr}^{-1}$  for both variables, to that simulated using CARRA forcing. This indicates that AROME-ARCTIC can be used to create near real-time estimates of the climatic mass balance of Svalbard, although the uncertainties may be larger than generated by the CARRA-forced simulations.

Figure 11 shows the daily accumulated mass balance from CARRA and AROME-ARCTIC forced simulations. The mean of the CARRA-forced simulations from 1991-2021 is shown with a dashed black line, while the minimum and maximum years are shown in grey. The 2020/21 and 2021/22 mass balance years calculated with AROME-ARCTIC are shown in red and blue. In order to better compare the CARRA and AROME-ARCTIC forced simulations, the AROME-ARCTIC-forced estimates are shown with an uncertainty, given as two standard deviations of the differences between the CARRA and AROME-ARCTIC forced simulations from 2016/17-2020/21. In other words, this uncertainty indicates what the cmb would most likely be if CARRA had been used as forcing as opposed to AROME-ARCTIC for these simulations. During the winter months, there is generally little difference between the simulations with the difference forcings, and we can therefore have a high confidence in the AROME-ARCTIC results. During the summer, however, larger differences arise between the different products, which accumulate over the melt season. Based on the 2016/17-2020/21 simulations, the estimated standard error in the cmb is  $0.12 \text{ m w.e.}$  by the end of the mass balance year.

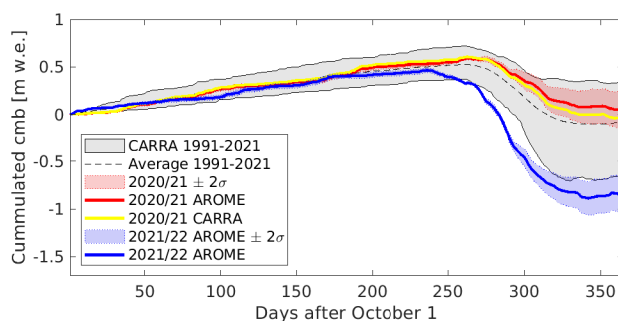

**Figure 11.** The span in daily accumulated cmb from 1991/92-2021/22 simulated using CARRA and AROME-ARCTIC climate forcing. The 2020/21 and 2021/22 mass balance years are simulated using AROME-ARCTIC (shown in red and blue). The CARRA result from 2020/21 is additionally shown in yellow. The uncertainty of the AROME-ARCTIC estimate is defined as two standard deviations of the differences between the CARRA and AROME-ARCTIC forced simulations from 2016/17-2020/21.

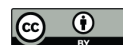

Since AROME-ARCTIC output is made available daily on the Norwegian Meteorological Institute server, it is possible to  
410 create an automatically updating product of mass balance, runoff, etc. for Svalbard. However, since this is an evolving product,  
technical difficulties may occur if data formats or naming conventions change, or if the forecast files are missing for longer  
than a few days.

### 6.3 Uncertainty

Several sources of uncertainty are introduced through the creation of the glacier mass balance dataset in this study. The sources  
415 of these uncertainties are comprised of the model physics, the initial model state, atmospheric forcing, glacier extent and  
topographic simplification. It is, however, difficult to quantify the contribution of each individual source. This section discusses  
these sources of uncertainty.

#### 6.3.1 Model physics and initialisation

Although the snow and firn scheme is based on the CROCUS model, the physics of which has been used and validated in a  
420 number of glacier mass balance and snow studies (Cullather et al., 2016; Schmidt et al., 2017; Verjans et al., 2019), there may  
still be uncertainties connected to using this model in Svalbard. For example, previous studies have shown that CROCUS does  
not always perform well under Arctic conditions, therefore, we have made a number of changes to the original model as e.g.  
suggested by Royer et al. (2021). However, most of the model variables are based on recommendations from previous studies  
and have not been tuned for the conditions of Svalbard. Although the model does well when compared to observations, potential  
425 biases may arise in other regions of Svalbard. To initialize the sub-surface conditions, a 30-year spin-up was performed. This  
was done by repeating the forcing from 1991-2000, until the model output was approximately in balance with the applied  
climate forcing. This could introduce some biases in both the extent and depth of the firn area, as the glaciers may not have  
been in balance with the 1991-2000 climate in reality.

#### 6.3.2 Model forcing

430 We find good agreement between CARRA forcing and the meteorological variables and the incoming radiation over glaciers  
and non-glaciated land (see Supplement S2,S3 for details), although it should be noted that the non-glaciated land based AWSs  
are assimilated into the CARRA product. Comparison against winter mass balance stake observations shows CARRA pre-  
cipitation has a low rmse overall (0.21 m w.e.), but is slightly underestimated over most of the glaciers (Table 2). This could  
be partly due to the spatial resolution of CARRA, as at a 2.5 km resolution the model might miss some of the impact of the  
435 terrain on the precipitation distribution, particularly in areas with complex topography. In addition, the simulated mass balance  
representing a 2.5 x 2.5 km cell may not be directly comparable with point-observations, as heterogeneities in the energy and  
mass balance occur at spatial scales less than 2.5 km. For example, in areas with high wind, redistribution of snow by the wind  
may have a large effect on the winter mass balance (e.g. Winther et al., 2003). Furthermore, since the stake observations are  
mainly taken along the glacier centerline, the observations do not reflect the horizontal distribution of the mass balance along



440 the measured glaciers.

In addition, using AROME-ARCTIC to generate a real time dataset adds additional uncertainties as this is a forecast and not a reanalysis product. From 2016 until the summer of 2019, the model was initialized with too little snow over some glacier points in the ablation area, thus leading to unrealistically high surface and 2m temperatures. To try to counter this effect, we use  
 445 the 10 m temperature for the AROME-ARCTIC-forced simulations when unrealistically high surface temperatures occur, but some biases may still persist. In addition, as previously discussed, due to missing data it is not always possible to use AROME-ARCTIC forecasts with a 6-hour lead time. Using an earlier forecast with longer lead times introduces higher forecast errors, and therefore using forecasts at different time steps may give different results.

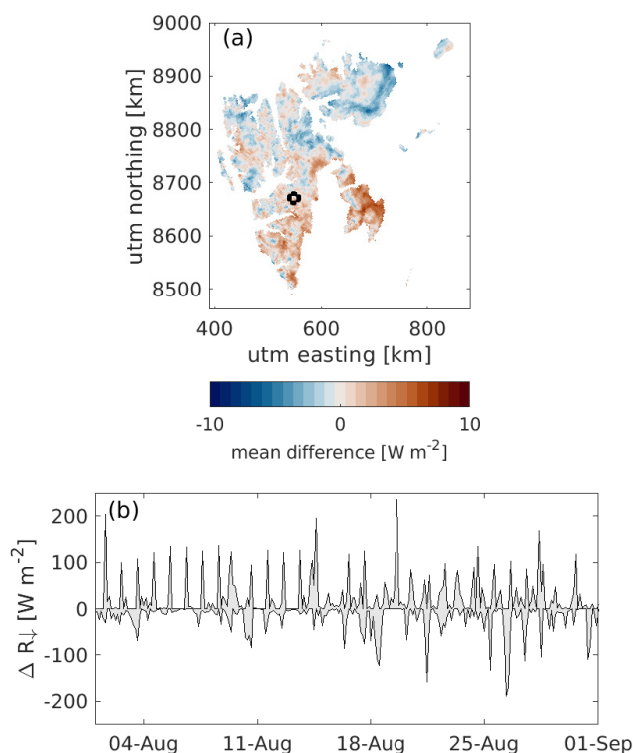

**Figure 12.** (a) Mean difference in August incoming radiation ( $R_{\downarrow}$ ) between 6-hour and 24-hour forecast lead times. (b) The temporal difference in incoming radiation between 12, 18, and 24 hour lead times versus a 6 hour lead time (grey area). Location of point is shown with a circle in (a).

As an example, Fig. 12 shows the differences in incoming radiation between various forecast lead times during August 2019.  
 450 Fig. 12a shows the mean difference between 6 hour and 24 hour lead times. Overall, the mean absolute difference is small ( $1.5 \text{ W m}^{-2}$ ) with a maximum average deviation of  $7.0 \text{ W m}^{-2}$ . However, at any given location and time step, the difference in incoming radiation between the different lead times may be a large as  $335 \text{ W m}^{-2}$ . An example of the temporal difference

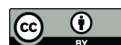

between forecast lead times of 6, 12, 18 and 24 hours is shown in the Fig. 12b. The grey area shows the maximum and minimum differences between the incoming radiation with a 6 hour lead time and 12, 18, and 24 hour lead times. The mean differences  
455 between the 6-hour and 12/18/24-hour lead times over the whole month is small, ranging between -8.2 to 8.4  $\text{W m}^{-2}$ , but at any given time step large differences ( $> 100 \text{ W m}^{-2}$ ) occur. Similar effects can be seen in the other meteorological variables, like precipitation, wind speed, and temperature. We expect the effect of the lead time used to be small over monthly or yearly timescales, but it can introduce large errors for specific days or areas.

460 Furthermore, the re-gridding of the AROME-ARCTIC product to the CARRA grid using linear interpolation may introduce additional errors.

### 6.3.3 Glacier extent and topography

Throughout the simulation period, we assume the elevation and glacier mask is fixed thus neglecting the effect of ice flow and elevation changes on the mass balance. Both the elevation and the glacier mask are based on observations collected between 2000-2010 and should therefore be representative for most of the investigated period.

465 The added error of a fixed glacier mask has previously been investigated by Østby et al. (2017). The authors found that the error in the climatic mass balance associated with using a fixed glacier mask (based on observations from the 2000s) as opposed to a time-varying mask was on average  $0.02 \text{ m w.e.}^{-1}$  for the period 1957-2014. Since the period investigated in this study is smaller and more closely matches the time period the glacier mask was created, we expect the error due to a fixed glacier mask in our simulations to be equal or smaller than the value found by Østby et al. (2017).

470 Using a fixed elevation mask may introduce a negative bias in the beginning of our study period, as the elevation may be too low, and a positive bias towards the end of the study period where the used elevation mask may be too high. On average for Svalbard, the glaciers elevation decreased at a rate of  $0.36 \text{ m yr}^{-1}$  from 2000-2020 (Hugonnet et al., 2021), while between the mid-1960's and 2005 the glacier elevation outside Austfonna and Kvitøya decreased, on average, at a rate of  $0.49 \text{ m yr}^{-1}$  (Nuth et al., 2010). Considering the elevation map used in this study is based on observations from the 2000s, we expect  
475 the maximum average deviation to be 10 m. Assuming a change of mass balance with elevation of  $3 \cdot 10^{-3} \text{ m w.e. m}^{-1}$ , we expect the error associated with the constant glacier mask to be less than  $0.03 \text{ m w.e. yr}^{-1}$ .

## 6.4 Comparison with other studies

Several other studies have previously quantified the Svalbard-wide mass balance and runoff. Direct comparison between our results and other studies is in some cases hampered by differences in time period, areal coverage, and the type of mass balance  
480 calculated (e.g. estimates from gravimetry or geodetic methods will estimate the total mass balance, including frontal ablation).

Here, we only compare against studies which calculate either the climatic or surface mass balance, and who have published results within our simulation period of 1991-2020. When available, we compare simulated average 2m temperature, yearly precipitation, climatic mass balance, and runoff (Table 3 and Fig. 13).

485 The climatic mass balance simulated in this study is similar to estimates from other studies. The cmb in this study is slightly less negative than that simulated by Lang et al. (2015), which could partly be due to the higher precipitation in this study. There





| study                  | period    | Tair<br>[°C] | precipitation<br>[m w.e. yr <sup>-1</sup> ] | cmb<br>[m w.e. yr <sup>-1</sup> ] | runoff<br>[m w.e. yr <sup>-1</sup> ] |
|------------------------|-----------|--------------|---------------------------------------------|-----------------------------------|--------------------------------------|
| Lang et al. (2015)     | 1998-2007 | -            | 0.56                                        | -0.088                            | -                                    |
| This study             | 1998-2007 | -            | 0.64                                        | -0.073                            | -                                    |
| Aas et al. (2016)      | 2003-2013 | -            | -                                           | -0.26                             | -                                    |
| This study             | 2003-2013 | -            | -                                           | -0.038                            | -                                    |
| Østby et al. (2017)    | 1991-2014 | -7.3         | 0.70                                        | -0.10                             | -                                    |
| This study             | 1991-2014 | -8.4         | 0.65                                        | -0.057                            | -                                    |
| Van Pelt et al. (2019) | 1991-2018 | -8.5         | 0.95                                        | 0.015                             | 0.80                                 |
| This study             | 1991-2018 | -8.0         | 0.62                                        | -0.077                            | 0.79                                 |
| Noël et al. (2020)     | 1991-2018 | -            | 0.71 <sup>1</sup>                           | -0.064                            | 0.77                                 |
| This study             | 1991-2018 | -            | 0.70 <sup>1</sup>                           | -0.077                            | 0.79                                 |

**Table 3.** Svalbard climatic variables (precipitation and 2m temperature), climatic mass balance, and glacier runoff from different modeling studies. <sup>1</sup>only precipitation over glaciers.

are larger differences between our cmb and the estimates by Aas et al. (2016) and Østby et al. (2017), where our simulated cmb is lower by 0.22 and 0.05 m w.e. yr<sup>-1</sup>, respectively. In the case of Østby et al. (2017), this is partly due to a big difference between the estimates for 2013, where the cmb estimated by Østby et al. (2017) is strongly negative. A more negative mass balance is consistent with the higher average 2m temperatures used for their simulations. On the other hand, our simulations have a more negative cmb than those simulated by Van Pelt et al. (2019). This is likely related to the much lower precipitation in our simulations. When comparing the estimates of specific runoff, our results are consistent with Van Pelt et al. (2019). The precipitation, cmb, and runoff values in this study are consistent with those of Noël et al. (2020).

The temporal evolution of each of the cmb studies are plotted against our results in Fig. 13. The temporal pattern is similar for all the estimates, with high inter-model correlations between 0.8 and 0.9.

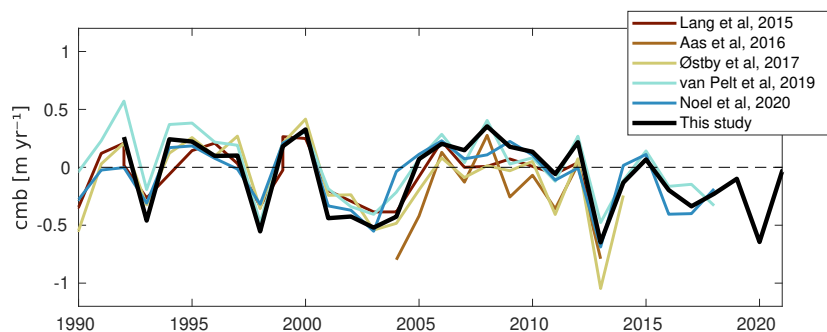

**Figure 13.** Time series of yearly cmb from different model studies from 1990-2021.



## 495 7 Conclusions

Using the novel high-resolution reanalysis dataset CARRA as well as the high-resolution regional forecast product AROME-ARCTIC as forcing for simulations of the coupled energy balance-subsurface model CryoGrid, we performed high-resolution simulations of the mass balance and runoff for Svalbard. The results from both the CARRA and AROME-ARCTIC forced simulations are presented, and the results are validated against in-situ observations from automatic weather stations and mass balance stakes as well as geodetic estimates.

We find that the area-averaged climatic mass balance over the period is slightly negative at  $-0.08$  m w.e.. For the 2016/17 - 2010/21 mass balance years, the area-averaged cmb in the AROME-ARCTIC-forced simulations differed by up to  $0.1$  m w.e.  $\text{yr}^{-1}$  from the CARRA-forced simulations. The largest differences were found in Nordenskiöldland, with ~~an average of~~  $0.44$  m w.e. higher cmb in the AROME-ARCTIC-forced simulations. This is most likely due to a larger amount of precipitation and lower temperatures in AROME-ARCTIC than in CARRA.

The average total runoff from 1991/92-2020/21 is  $41$   $\text{Gt yr}^{-1}$ , with  $29$   $\text{Gt yr}^{-1}$  coming from glaciers and  $12$   $\text{Gt yr}^{-1}$  coming from non-glaciated land. There is a significant positive trend in both the glacier runoff ( $5.2$   $\text{Gt decade}^{-1}$ ) and land runoff ( $1.1$   $\text{Gt decade}^{-1}$ ). The average difference in glacier runoff between the AROME-ARCTIC and CARRA-forced simulations is  $1.0$   $\text{Gt yr}^{-1}$ , equivalent to only about 2% of the total runoff. Lower estimates of the runoff in the AROME-ARCTIC-forced simulations are found for Nordenskiöldland and Kvitøya.

We, therefore, find that the AROME-ARCTIC forecast product provides a good estimate of the cmb and runoff overall, although the uncertainties have to be kept in mind for some areas, particularly Nordenskiöldland. We therefore suggest that AROME-ARCTIC forecasts should be used to generate continuously updating, high-quality simulations of the cmb, runoff and snow conditions in Svalbard. These simulations, in addition to the CARRA-forced simulations, can be used for a wide range of application, e.g. as input for runoff, ocean circulation or ecosystem models.

These CryoGrid simulations could be expanded to cover the whole CARRA-East and AROME-ARCTIC domains and thus provide valuable estimates of the runoff from all land areas in the Barents sea region. Knowledge of the climatic glacial mass balance and runoff from Franz Josef Land and Novaya Zemlya are sparse, and using the setup presented here could provide valuable insight. Since Svalbard, Franz Josef Land, and Novaya Zemlya experience similar climatic conditions, it is likely a model which performs well for Svalbard will also perform well for these regions. However, since less observational data are available for assimilation into the CARRA reanalysis and the AROME-ARCTIC forecasts, the uncertainties for these regions may be higher.

*Code and data availability.* The simulations described in this paper from both CARRA and AROME-ARCTIC forced simulations are available at

<https://doi.org/10.21343/ncwc-s086> (Schmidt, 2022) at both a daily and monthly temporal resolution.

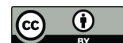

AWS data from MET-Norway is freely available from <https://frost.met.no>. The Kongsvegen AWS time series are also accessible at <https://doi.org/10.21334/npolar.2017.5dc31930> (Kohler et al., 2017). Glacier-wide mass balances for Kongsvegen, Hansbreen, Holtedahlfonna, and Austre Brøggerbreen are available in the database of the World Glacier Monitoring Service (<https://wgms.ch/>).

AROME-ARCTIC can be downloaded from <https://thredds.met.no/thredds/catalog/aromearcticarchive/catalog.html>. CARRA data (Schyberg et al., 2020) was downloaded from the Copernicus Climate Change Service (C3S) Climate Data Store. The results contain modified Copernicus Climate Change Service information 2022. Neither the European Commission nor ECMWF is responsible for any use that may be made of the Copernicus information or data it contains.

The CryoGrid community model is hosted on Github. The source code is available at [https://github.com/CryoGrid/CryoGridCommunity\\_source](https://github.com/CryoGrid/CryoGridCommunity_source)

535 .

*Author contributions.* LSS and SW developed the model code. LSS performed the simulations, analyzed the results and produced the dataset and associated metadata. TVS helped with discussion and analyzing the results. EET provided CARRA inputs. LSS prepared the manuscript with contributions from all co-authors.

*Competing interests.* We declare no competing interests

540 *Acknowledgements.* We gratefully acknowledge the Carleen Tijm-Reijmer and the Institute for Marine and Atmospheric research Utrecht (IMAU) for providing AWS data from Nordenskiöldbreen and Ulvebreen. In addition, we acknowledge Øystein Godøy and Lara Ferrighi for their valuable help with data archiving. The AWS on Nordenskiöldbreen and Ulvebreen were funded by the Dutch Polar Programme of the Dutch Research Council (NWO-NPP). The research conducted in this study was funded by the Research Council of Norway through the Nansen Legacy project (NFR-276730). The simulations were performed on resources provided by the Department of Geosciences, University  
545 of Oslo.



## References

- Aas, K. S., Dunse, T., Collier, E., Schuler, T. V., Berntsen, T. K., Kohler, J., and Luks, B.: The climatic mass balance of Svalbard glaciers: a 10-year simulation with a coupled atmosphere–glacier mass balance model, *The Cryosphere*, 10, 1089–1104, <https://doi.org/10.5194/tc-10-1089-2016>, 2016.
- 550 AMAP: Snow, Water, Ice and Permafrost in the Arctic (SWIPA), Tech. rep., <https://www.amap.no/documents/doc/snow-water-ice-and-permafrost-in-the-arctic-swipa-2017/1610>, 2017.
- Bengtsson, L., Andrae, U., Aspelien, T., Batrak, Y., Calvo, J., de Rooy, W., Gleeson, E., Hansen-Sass, B., Homleid, M., Hortal, M., Ivarsson, K.-I., Lenderink, G., Niemelä, S., Nielsen, K. P., Onvlee, J., Rontu, L., Samuelsson, P., Muñoz, D. S., Subias, A., Tijn, S., Toll, V., Yang, X., and Køltzow, M. Ø.: The HARMONIE–AROME Model Configuration in the ALADIN–HIRLAM NWP System, *Monthly Weather*
- 555 *Review*, 145, 1919–1935, <https://doi.org/10.1175/MWR-D-16-0417.1>, 2017.
- Błaszczyk, M., Jania, J. A., and Hagen, J. O.: Tidewater glaciers of Svalbard: Recent changes and estimates of calving fluxes, vol. 30, 2009.
- Carroll, D., Sutherland, D. A., Shroyer, E. L., Nash, J. D., Catania, G. A., and Stearns, L. A.: Subglacial discharge-driven renewal of tidewater glacier fjords, *Journal of Geophysical Research: Oceans*, 122, 6611–6629, <https://doi.org/10.1002/2017JC012962>, 2017.
- Church, J., Clark, P., Cazenave, A., Gregory, J., Jevrejeva, S., Levermann, A., Merrifield, M., Milne, G., Nerem, R., Nunn, P., Payne, A.,
- 560 Pfeffer, W., Stammer, D., and Unnikrishnan, A.: Sea Level Change, in: *imate Change 2013: The Physical Science Basis. Contribution of Working Group I to the Fifth Assessment Report of the Intergovernmental Panel on Climate Change*, edited by Stocker, T., Qin, D., Plattner, G.-K., Tignor, M., Allen, S., Boschung, J., Nauels, A., Xia, Y., Bex, V., and Midgley, P., Cambridge University Press, Cambridge, United Kingdom and New York, NY, USA, 2013.
- Cuffey, K. . and Paterson, W.: *The physics of glaciers*, vol. 2, [https://doi.org/10.1016/0016-7185\(71\)90086-8](https://doi.org/10.1016/0016-7185(71)90086-8), 2010.
- 565 Cullather, R. I., Nowicki, S. M. J., Zhao, B., and Koenig, L. S.: A Characterization of Greenland Ice Sheet Surface Melt and Runoff in Contemporary Reanalyses and a Regional Climate Model, *Frontiers in Earth Science*, 4, <https://doi.org/10.3389/feart.2016.00010>, 2016.
- Dee, D. P., Uppala, S. M., Simmons, A. J., Berrisford, P., Poli, P., Kobayashi, S., Andrae, U., Balmaseda, M. A., Balsamo, G., Bauer, P., Bechtold, P., Beljaars, A. C. M., Bidlot, J., Bormann, N., Delsol, C., Dragani, R., Fuentes, M., Geer, A. J., Isaksen, L., Haimberger, L., Healy, S. B., Hersbach, H., Matricardi, M., McNally, A. P., Peubey, C., Rosnay, P. D., Tavolato, C., and Vitart, F.: The ERA-Interim
- 570 reanalysis: configuration and performance of the data assimilation system, *Quarterly Journal of the Royal Meteorological Society*, 137, 553–597, <https://doi.org/10.1002/qj.828>, 2011.
- Farinotti, D., Huss, M., Fürst, J. J., Landmann, J., Machguth, H., Maussion, F., and Pandit, A.: A consensus estimate for the ice thickness distribution of all glaciers on Earth, *Nature Geoscience*, 12, 168–173, <https://doi.org/10.1038/s41561-019-0300-3>, 2019.
- Førland, E. J. and Hanssen-Bauer, I.: Past and future climate variations in the Norwegian Arctic: overview and novel analyses, *Polar Research*,
- 575 22, 113–124, <https://doi.org/10.1111/j.1751-8369.2003.tb00102.x>, 2003.
- Førland, E. J., Isaksen, K., Lutz, J., Hanssen-Bauer, I., Schuler, T. V., Dobler, A., Gjeltén, H. M., and Vikhamar-Schuler, D.: Measured and Modeled Historical Precipitation Trends for Svalbard, *Journal of Hydrometeorology*, 21, 1279–1296, <https://doi.org/10.1175/JHM-D-19-0252.1>, 2020.
- Fürst, J. J., Navarro, F., Gillet-Chaulet, F., Huss, M., Moholdt, G., Fettweis, X., Lang, C., Seehaus, T., Ai, S., Benham, T. J., Benn, D. I.,
- 580 Björnsson, H., Dowdeswell, J. A., Grabiec, M., Kohler, J., Lavrentiev, I., Lindbäck, K., Melvold, K., Pettersson, R., Rippin, D., Saintenoy, A., Sánchez-Gómez, P., Schuler, T. V., Sevestre, H., Vasilenko, E., and Braun, M. H.: The Ice-Free Topography of Svalbard, *Geophysical Research Letters*, 45, 760–11, <https://doi.org/10.1029/2018GL079734>, 2018.



- Grabiec, M., Jania, J. A., Puczko, D., Kolondra, L., and Budzik, T.: Surface and bed morphology of Hansbreen, a tidewater glacier in Spitsbergen, *Polish Polar Research*, 33, 111–138, <https://doi.org/10.2478/v10183-012-0010-7>, 2012.
- 585 Graversen, R. G., Mauritsen, T., Tjernström, M., Källén, E., and Svensson, G.: Vertical structure of recent Arctic warming, *Nature*, 451, 53–56, <https://doi.org/10.1038/nature06502>, 2008.
- Hagen, B. J., Melvold, K., Eiken, T., Isaksson, E., and Lefauconnier, B.: Mass balance methods on Kongsvegen, Svalbard, Svalbard. *Geogr. Ann.*, pp. 81–85, 1999.
- Hagen, J. O., Kohler, J., Melvold, K., and Winther, J.-G.: Glaciers in Svalbard: mass balance, runoff and freshwater flux, *Polar Research*, 22, 145–159, <https://doi.org/10.1111/j.1751-8369.2003.tb00104.x>, 2003.
- 590 Hersbach, H., Bell, B., Berrisford, P., Hirahara, S., Horányi, A., Muñoz-Sabater, J., Nicolas, J., Peubey, C., Radu, R., Schepers, D., Simmons, A., Soci, C., Abdalla, S., Abellan, X., Balsamo, G., Bechtold, P., Biavati, G., Bidlot, J., Bonavita, M., Chiara, G., Dahlgren, P., Dee, D., Diamantakis, M., Dragani, R., Flemming, J., Forbes, R., Fuentes, M., Geer, A., Haimberger, L., Healy, S., Hogan, R. J., Hólm, E., Janisková, M., Keeley, S., Laloyaux, P., Lopez, P., Lupu, C., Radnoti, G., Rosnay, P., Rozum, I., Vamborg, F., Villaume, S., and Thépaut, J.: The ERA5 global reanalysis, *Quarterly Journal of the Royal Meteorological Society*, 146, 1999–2049, <https://doi.org/10.1002/qj.3803>, 2020.
- 595 Hock, R., Bliss, A., Marzeion, B. E., Giesen, R. H., Hirabayashi, Y., Huss, M., Radic, V., and Slangen, A. B.: GlacierMIP—A model intercomparison of global-scale glacier mass-balance models and projections, *Journal of Glaciology*, 65, 453–467, <https://doi.org/10.1017/jog.2019.22>, 2019.
- 600 Hopwood, M. J., Carroll, D., Dunse, T., Hodson, A., Holding, J. M., Iriarte, J. L., Ribeiro, S., Achterberg, E. P., Cantoni, C., Carlson, D. F., Chierici, M., Clarke, J. S., Cozzi, S., Fransson, A., Juul-Pedersen, T., Winding, M. H. S., and Meire, L.: Review article: How does glacier discharge affect marine biogeochemistry and primary production in the Arctic?, *The Cryosphere*, 14, 1347–1383, <https://doi.org/10.5194/tc-14-1347-2020>, 2020.
- Hugonnet, R., McNabb, R., Berthier, E., Menounos, B., Nuth, C., Girod, L., Farinotti, D., Huss, M., Dussaillant, I., Brun, F., and Käab, A.: Accelerated global glacier mass loss in the early twenty-first century, *Nature*, 592, 726–731, <https://doi.org/10.1038/s41586-021-03436-z>, 2021.
- 605 Huss, M. and Hock, R.: Global-scale hydrological response to future glacier mass loss, *Nature Climate Change*, 8, 135–140, <https://doi.org/10.1038/s41558-017-0049-x>, 2018.
- IPCC: IPCC Special Report on the Ocean and Cryosphere in a Changing Climate, 2019.
- 610 Isaksen, K., Nordli, E. J., Fjørland, E. J., Łupikasza, E., Eastwood, S., and Niedźwiedz, T.: Recent warming on Spitsbergen—Influence of atmospheric circulation and sea ice cover, *Journal of Geophysical Research: Atmospheres*, 121, <https://doi.org/10.1002/2016JD025606>, 2016.
- Jonsell, U., Pohjola, V., Pettersson, R., and Hock, R.: Automatic Weather Station Data from the Vestfonna Ice Cap (Dataset), Tech. rep., 2010.
- 615 Käsmacher, O. and Schneider, C.: An objective circulation pattern classification for the region of Svalbard, *Geografiska Annaler: Series A, Physical Geography*, 93, 259–271, <https://doi.org/10.1111/j.1468-0459.2011.00431.x>, 2011.
- Kohler, J., Hudson, S. R., and Obleitner, F.: Automatic weather station data from Kongsvegen, Ny-Ålesund (Dataset), Tech. rep., <https://doi.org/10.21334/npolar.2017.5dc31930>, 2017.
- Lang, C., Fettweis, X., and Ericum, M.: Stable climate and surface mass balance in Svalbard over 1979&—2013 despite the Arctic warming, *The Cryosphere*, 9, 83–101, <https://doi.org/10.5194/tc-9-83-2015>, 2015.
- 620



- Lefebre, F., Gallée, H., van Ypersele, J.-P., and Greuell, W.: Modeling of snow and ice melt at ETH Camp (West Greenland): A study of surface albedo, *Journal of Geophysical Research: Atmospheres*, 108, n/a–n/a, 2003.
- Lind, S., Ingvaldsen, R. B., and Furevik, T.: Arctic warming hotspot in the northern Barents Sea linked to declining sea-ice import, *Nature Climate Change*, 8, 634–639, <https://doi.org/10.1038/s41558-018-0205-y>, 2018.
- 625 Lubinski, D. J., Forman, S. L., and Miller, G. H.: Holocene glacier and climate fluctuations on Franz Josef Land, Arctic Russia, 80°N, *Tech. Rep. 1*, [https://doi.org/10.1016/S0277-3791\(97\)00105-4](https://doi.org/10.1016/S0277-3791(97)00105-4), 1999.
- Meier, M. F., Dyurgerov, M. B., Rick, U. K., O’Neel, S., Pfeffer, W. T., Anderson, R. S., Anderson, S. P., and Glazovsky, A. F.: Glaciers dominate eustatic sea-level rise in the 21st century, *Science*, 317, 1064–1067, <https://doi.org/10.1126/science.1143906>, 2007.
- Moholdt, G., Nuth, C., Hagen, J. O., and Kohler, J.: Recent elevation changes of Svalbard glaciers derived from ICESat laser altimetry, *630 Remote Sensing of Environment*, 114, 2756–2767, <https://doi.org/10.1016/j.rse.2010.06.008>, 2010.
- Mottram, R., Nielsen, K. P., Gleeson, E., and Yang, X.: Modelling Glaciers in the HARMONIE-AROME NWP model, *Advances in Science and Research*, 14, 323–334, <https://doi.org/10.5194/asr-14-323-2017>, 2017.
- Müller, M., Homleid, M., Ivarsson, K. I., Køltzow, M. A., Lindskog, M., Midtbø, K. H., Andrae, U., Aspeli, T., Berggren, L., Bjørge, D., Dahlgren, P., Kristiansen, J., Randriamampianina, R., Ridal, M., and Vignes, O.: AROME-MetCoOp: A nordic convective-scale operational weather prediction model, *635 Weather and Forecasting*, 32, 609–627, <https://doi.org/10.1175/WAF-D-16-0099.1>, 2017.
- Noël, B., Jakobs, C. L., van Pelt, W. J., Lhermitte, S., Wouters, B., Kohler, J., Hagen, J. O., Luks, B., Reijmer, C. H., van de Berg, W. J., and van den Broeke, M. R.: Low elevation of Svalbard glaciers drives high mass loss variability, *Nature Communications*, 11, 1–8, <https://doi.org/10.1038/s41467-020-18356-1>, 2020.
- Nordli, , Przybylak, R., Ogilvie, A. E., and Isaksen, K.: Long-term temperature trends and variability on Spitsbergen: the extended Svalbard Airport temperature series, 1898–2012, *640 Polar Research*, 33, 21 349, <https://doi.org/10.3402/polar.v33.21349>, 2014.
- Nuth, C., Moholdt, G., Kohler, J., Hagen, J. O., and Kääb, A.: Svalbard glacier elevation changes and contribution to sea level rise, *Journal of Geophysical Research*, 115, F01 008, <https://doi.org/10.1029/2008JF001223>, 2010.
- Nuth, C., Kohler, J., König, M., Von Deschanden, A., Hagen, J. O., Kääb, A., Moholdt, G., and Pettersson, R.: The Cryosphere Decadal changes from a multi-temporal glacier inventory of Svalbard, *The Cryosphere*, 7, 1603–1621, <https://doi.org/10.5194/tc-7-1603-2013>, 645 2013.
- Østby, T. I., Vikhamar Schuler, T., Ove Hagen, J., Hock, R., Kohler, J., and Reijmer, C. H.: Diagnosing the decline in climatic mass balance of glaciers in Svalbard over 1957–2014, *Cryosphere*, 11, 191–215, <https://doi.org/10.5194/tc-11-191-2017>, 2017.
- Pfeffer, W. T., Arendt, A. A., Bliss, A., Bolch, T., Cogley, J. G., Gardner, A. S., Hagen, J.-O., Hock, R., Kaser, G., Kienholz, C., Miles, E. S., Moholdt, G., Mölg, N., Paul, F., Radić, V., Rastner, P., Raup, B. H., Rich, J., and Sharp, M. J.: The Randolph Glacier Inventory: a globally complete inventory of glaciers, *650 Journal of Glaciology*, 60, 537–552, <https://doi.org/10.3189/2014JoG13J176>, 2014.
- Radić, V., Bliss, A., Beedlow, A. C., Hock, R., Miles, E., and Cogley, J. G.: Regional and global projections of twenty-first century glacier mass changes in response to climate scenarios from global climate models, *Climate Dynamics*, 42, 37–58, <https://doi.org/10.1007/s00382-013-1719-7>, 2014.
- Royer, A., Picard, G., Vargel, C., Langlois, A., Gouttevin, I., and Dumont, M.: Improved Simulation of Arctic Circumpolar Land Area Snow Properties and Soil Temperatures, *655 Frontiers in Earth Science*, 9, 515, <https://doi.org/10.3389/feart.2021.685140>, 2021.
- Schmidt, L. S.: CryoGrid simulations of Svalbard mass balance, refreezing and runoff, 1991–2022, Norwegian Meteorological Institute, <https://doi.org/https://doi.org/10.21343/NCWC-S086>, 2022.



- Schmidt, L. S., Aðalgeirsdóttir, G., Guðmundsson, S., Langen, P. L., Pálsson, F., Mottram, R., Gascoïn, S., and Björnsson, H.: The importance of accurate glacier albedo for estimates of surface mass balance on Vatnajökull: evaluating the surface energy budget in a regional climate model with automatic weather station observations, *The Cryosphere*, 11, 1665–1684, <https://doi.org/10.5194/tc-11-1665-2017>, 2017.
- Schmidt, L. S., Langen, P. L., Aðalgeirsdóttir, G., Pálsson, F., Guðmundsson, S., and Gunnarsson, A.: Sensitivity of Glacier Runoff to Winter Snow Thickness Investigated for Vatnajökull Ice Cap, Iceland, Using Numerical Models and Observations, *Atmosphere*, 9, 450, <https://doi.org/10.3390/atmos9110450>, 2018.
- Schuler, T. V., Dunse, T., Østby, T. I., and Hagen, J. O.: Meteorological conditions on an Arctic ice cap-8years of automatic weather station data from Austfonna, Svalbard, *International Journal of Climatology*, 34, 2047–2058, <https://doi.org/10.1002/joc.3821>, 2014.
- Schuler, T. V., Kohler, J., Elagina, N., Hagen, J. O. M., Hodson, A. J., Jania, J. A., Kääb, A. M., Luks, B., Małeckı, J., Moholdt, G., Pohjola, V. A., Sobota, I., and Van Pelt, W. J.: Reconciling Svalbard Glacier Mass Balance, *Frontiers in Earth Science*, 8, 1–16, <https://doi.org/10.3389/feart.2020.00156>, 2020.
- Schyberg, H., Yang, X., Køltzow, M., Amstrup, B., Bakketun, , Bazile, E., Bojarova, J., Box, J., Dahlgren, P., Hagelin, S., Homleid, M., Horányi, A., Høyer, J., Johansson, , Killie, M., Körnich, H., Le Moigne, P., Lindskog, M., Manninen, T., Nielsen Englyst, P., and Wang, Z.: Arctic regional reanalysis on single levels from 1991 to present, Copernicus Climate Change Service (C3S) Climate Data Store (CDS), <https://doi.org/10.24381/cds.713858f6>, 2020.
- Screen, J. A. and Simmonds, I.: Increasing fall-winter energy loss from the Arctic Ocean and its role in Arctic temperature amplification, *Geophysical Research Letters*, 37, n/a–n/a, <https://doi.org/10.1029/2010GL044136>, 2010.
- Serreze, M. C. and Francis, J. A.: The arctic amplification debate, *Climatic Change*, 76, 241–264, <https://doi.org/10.1007/s10584-005-9017-y>, 2006.
- Shimizu, H.: Air Permeability of Deposited Snow, *Contributions from the Institute of Low Temperature Science*, A22, 1–32, 1970.
- Uppala, S. M., Kållberg, P. W., Simmons, A. J., Andrae, U., Bechtold, V. D. C., Fiorino, M., Gibson, J. K., Haseler, J., Hernandez, A., Kelly, G. A., Li, X., Onogi, K., Saarinen, S., Sokka, N., Allan, R. P., Andersson, E., Arpe, K., Balmaseda, M. A., Beljaars, A. C. M., Berg, L. V. D., Bidlot, J., Bormann, N., Caires, S., Chevallier, F., Dethof, A., Dragosavac, M., Fisher, M., Fuentes, M., Hagemann, S., Hólm, E., Hoskins, B. J., Isaksen, L., Janssen, P. A. E. M., Jenne, R., McNally, A. P., Mahfouf, J.-F., Morcrette, J.-J., Rayner, N. A., Saunders, R. W., Simon, P., Sterl, A., Trenberth, K. E., Untch, A., Vasiljevic, D., Viterbo, P., and Woollen, J.: The ERA-40 re-analysis, *Quarterly Journal of the Royal Meteorological Society*, 131, 2961–3012, <https://doi.org/10.1256/qj.04.176>, 2005.
- van Genuchten, M. T.: A Closed-form Equation for Predicting the Hydraulic Conductivity of Unsaturated Soils, *Soil Science Society of America Journal*, 44, 892–898, <https://doi.org/10.2136/sssaj1980.03615995004400050002x>, 1980.
- Van Pelt, W., Pohjola, V., Pettersson, R., Marchenko, S., Kohler, J., Luks, B., Ove Hagen, J., Schuler, T. V., Dunse, T., Noël, B., and Reijmer, C.: A long-term dataset of climatic mass balance, snow conditions, and runoff in Svalbard (1957–2018), *Cryosphere*, 13, 2259–2280, <https://doi.org/10.5194/tc-13-2259-2019>, 2019.
- Van Pelt, W. J., Oerlemans, J., Reijmer, C. H., Pohjola, V. A., Pettersson, R., and Van Angelen, J. H.: Simulating melt, runoff and refreezing on Nordenskiöldbreen, Svalbard, using a coupled snow and energy balance model, *Cryosphere*, 6, 641–659, <https://doi.org/10.5194/tc-6-641-2012>, 2012.
- Vaughan, D. G., Comiso, J. C., Allison, I., Carrasco, J., Kaser, G., Kwok, R., Mote, P., Murray, T., Paul, F., Ren, J., Rignot, E., Solomina, O., Steffen, K., and Zhang, T.: Observations: Cryosphere, in: *Climate Change 2013: The Physical Science Basis. Contribution of Working Group I to the Fifth Assessment Report of the Intergovernmental Panel on Climate Change*, edited by Stocker, T. F., Qin, D., Plattner,



- 695 G.-K., Tignor, M., Allen, S. K., Boschung, J., Nauels, A., Xia, Y., Bex, V., and Midgley, P. M., Cambridge University Press, Cambridge, United Kingdom and New York, NY, USA, Cambridge, 2013.
- Verjans, V., Leeson, A. A., Stevens, C. M., MacFerrin, M., Noël, B., and van den Broeke, M. R.: Development of physically based liquid water schemes for Greenland firn-densification models, *The Cryosphere*, 13, 1819–1842, <https://doi.org/10.5194/tc-13-1819-2019>, 2019.
- Vionnet, V., Brun, E., Morin, S., Boone, A., Faroux, S., Le Moigne, P., Martin, E., and Willemet, J. M.: The detailed snowpack scheme Crocus and its implementation in SURFEX v7.2, *Geoscientific Model Development*, 5, 773–791, <https://doi.org/10.5194/gmd-5-773-2012>, 2012.
- 700 Walczowski, W. and Piechura, J.: Influence of the West Spitsbergen Current on the local climate, *International Journal of Climatology*, 31, 1088–1093, <https://doi.org/10.1002/joc.2338>, 2011.
- Westermann, S., Ingeman-Nielsen, T., Scheer, J., Aalstad, K., Aga, J., Chaudhary, N., Eitzelmüller, B., Filhol, S., Kääh, A., Renette, C., Schmidt, L. S., Schuler, T. V., Zweigel, R. B., Martin, L., Morard, S., Ben-Asher, M., Angelopoulos, M., Boike, J., Groenke, B., Miesner, F., Nitzbon, J., Overduin, P., Stuenzi, S. M., and Langer, M.: The CryoGrid community model (version 1.0)-a multi-physics toolbox for climate-driven simulations in the terrestrial cryosphere, *Geoscientific Model Development Discussions*, <https://doi.org/10.5194/gmd-2022-127>, 2022.
- 705 Winther, J.-G., Bruland, O., Sand, K., Gerland, S., Marechal, D., Ivanov, B., Gøowacki, P., and König, M.: Snow research in Svalbard—an overview, *Polar Research*, 22, 125–144, <https://doi.org/10.3402/polar.v22i2.6451>, 2003.
- 710 Yang, X., Nielsen, K. P., Amstrup, B., Peralta, C., Høyer, J., Englyst, P. N., Schyberg, H., Homleid, M., Køltzow, M., Randriamampianina, R., Dahlgren, P., Støylen, E., Valkonen, T., Palmason, B., Thorsteinsson, S., Bojarova, J., Körnich, H., Lindskog, M., Box, J., and Mankoff, K.: C3S Arctic regional reanalysis – Full system documentation, Tech. rep., 2021.
- Zweigel, R. B., Westermann, S., Nitzbon, J., Langer, M., Boike, J., Eitzelmüller, B., and Vikhamar Schuler, T.: Simulating Snow Redistribution and its Effect on Ground Surface Temperature at a High-Arctic Site on Svalbard, *Journal of Geophysical Research: Earth Surface*, 126, e2020JF005 673, <https://doi.org/10.1029/2020JF005673>, 2021.
- 715
